# Supplementary material for: Synthesis of 4-substituted oxazolo[4,5-c]quinolines by direct reaction at the C-4 position of oxazoles
Source: Royal Society of Chemistry journal article supplement (doi:10.1039/c4ob02224f), 2014-12-23

## **Synthesis of 4-substituted oxazolo[4,5-*c*]quinolines by direct reaction at C-4 position of oxazole**

Mahesh Akula,<sup>a</sup> Yadagiri Thigulla,<sup>a</sup> Connor Davis,<sup>b</sup> Mukund Jha<sup>b</sup> and Anupam Bhattacharya<sup>\*a</sup>

<sup>a</sup> Department of Chemistry, Birla Institute of Technology and Science-Pilani(Hyderabad Campus), Hyderabad-500078, India.

<sup>b</sup> Department of Biology and Chemistry, Nipissing University, North Bay, ON, P1B 8L7, Canada.

e-mail: [anupam@hyderabad.bits-pilani.ac.in](mailto:anupam@hyderabad.bits-pilani.ac.in)

### **SUPPORTING INFORMATION**

#### **Contents:**

**Procedures for preparation of compounds 2, 3 and 6**

**<sup>1</sup>H and <sup>13</sup>C NMR for the compounds 2, 3, 6, compounds 4(a-l) and compounds 7(a-d)**

## Procedures for preparation of compounds 2, 3 and 6

**Synthesis of 5-(2-nitrophenyl)oxazole (2):** To a mixture of 2-nitrobenzaldehyde (5g, 0.033 mol) and tosylmethylisocyanide (7.748g, 0.039 mol) in 30 ml of MeOH was added  $K_2CO_3$  (9.15g, 0.066 mol). The solution was refluxed for 6 hrs and then solvent was removed under reduced pressure. The residue was poured in to water and extracted with ethyl acetate. The organic layer was washed with brain and dried over  $Na_2SO_4$  organic layer was concentrated in vacuo and residue was purified by column chromatography with 15% ethylacetate/ hexane as a eluent.

Yield: 83%(5.14 g). Light brown solid, mp 71 °C.  $R_f = 0.5$ (Hexane / Ethyl acetate = 8:2 ). IR (KBr,  $cm^{-1}$ ): 3112, 1520, 1348, 1105.  $^1H$  NMR (300 MHz,  $CDCl_3$ ) :  $\delta$  7.36 (s, 1H), 7.51 (dd,  $J = 12.3, 4.5$  Hz, 1H), 7.65 (dt,  $J = 15.2, 6.4$  Hz, 2H), 7.81 (d,  $J = 8.1$  Hz, 1H), 7.95 (s, 1H).  $^{13}C$  NMR (75 MHz,  $CDCl_3$ ):  $\delta$  121.49, 124.43, 125.77, 129.66, 129.83, 132.65, 146.47, 147.38, 151.68. ESI-MS: 191(M+H<sup>+</sup>)

**Synthesis of 2-(oxazol-5-yl)aniline (3):** To a solution of *o*-nitrophenyloxazole (2g, 0.0105 mol) in 25 ml of methanol Fe (5.8g, 0.105mol) and 1ml of HCl were added and the reaction mixture was stirred at 60 °C for 8h. The reaction mixture was cooled to RT and passed through celite pad the solvent was evaporated. The residue was diluted with water and neutralized with  $NaHCO_3$ , extracted with ethyl acetate. The organic layer was washed with brain and dried over  $Na_2SO_4$  organic layer was concentrated in vacuo and residue was purified by column chromatography with 20% ethylacetate/ hexane as a eluent.

Yield: 68%(1.14 g) brown colour liquid,  $R_f = 0.5$ (Hexane / Ethyl acetate = 7:3). IR (KBr,  $cm^{-1}$ ): 3410, 3127, 2889, 1598, 1504, 1312, 1103.  $^1H$  NMR (300 MHz, DMSO)  $\delta$  5.34 (s, 2H), 6.66 (t,  $J = 7.5$  Hz, 1H), 6.84 (d,  $J = 8.1$  Hz, 1H), 7.09 (t,  $J = 7.6$  Hz, 1H), 7.42 (d,  $J = 7.7$  Hz, 1H), 8.40 (s, 1H), 7.49 (s, 1H).  $^{13}C$  NMR (75 MHz, DMSO):  $\delta$  111.99, 116.91, 117.08, 122.64, 127.27, 129.87, 145.38, 149.74, 151.11. ESI-MS: 161(M+H<sup>+</sup>)

**Synthesis of 3-(oxazol-5-yl)pyridin-2-amine (6):** To a mixture of 2-amino-3-pyridinecarboxaldehyde (0.8g, 0.00655mol) and tosylmethylisocyanide (1.5g, 0.00786 mol) in 30 ml of MeOH was added  $K_2CO_3$  (1.8g, 0.013 mol). The solution was refluxed for 6 hrs and then solvent was removed under reduced pressure. The residue was poured in to water and extracted with ethyl acetate. The organic layer was washed with brain and dried over  $Na_2SO_4$  organic layer was concentrated in vacuo and residue was purified by column chromatography with 40% ethylacetate/ hexane as an eluent.

Yield: 71.02%(0.745 g) Brown solid, mp 86 °C.  $R_f = 0.5$ (Hexane / Ethyl acetate = 6: 4). IR (KBr,  $cm^{-1}$ ): 3446, 3304, 3142,1643, 1569, 464, 1131.  $^1H$  NMR (300 MHz, DMSO)  $\delta$  8.45 (s, 1H), 8.02 (d,  $J = 4.4$  Hz, 1H), 7.75 (d,  $J = 7.4$  Hz, 1H), 7.59 (s, 1H), 6.69 (dd,  $J = 7.5, 4.9$  Hz, 1H), 6.11 (s, 2H).  $^{13}C$  NMR (75 MHz, DMSO):  $\delta$  107.08, 113.25, 123.44, 135.29, 148.10, 148.90, 151.84, 155.46. HRMS-ESI (m/z): Calcd for  $C_8H_8N_3O$   $[M+H]^+$ , 162.0667 found 162.0668.

**<sup>1</sup>H NMR (300 MHz, CDCl<sub>3</sub>) 5-(2-nitrophenyl)oxazole (2)**

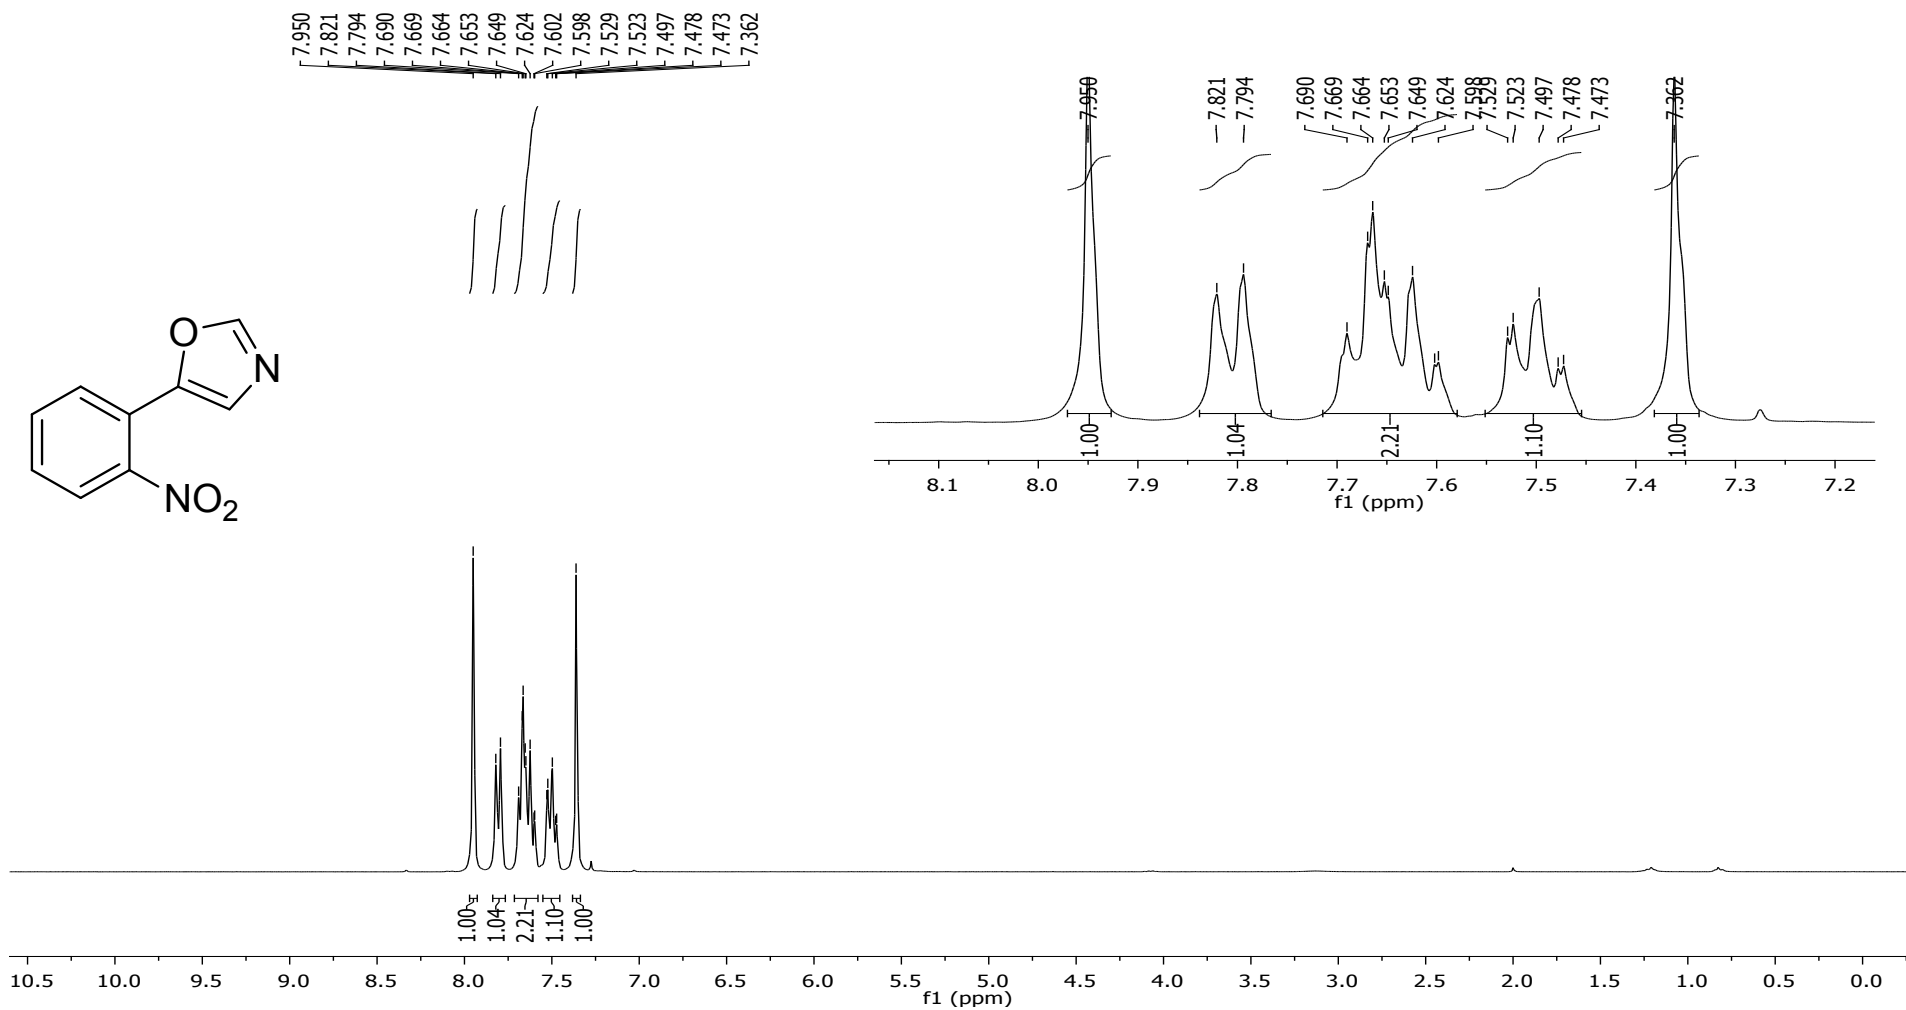

<sup>13</sup>C NMR(75.5 MHz, CDCl<sub>3</sub>) 5-(2-nitrophenyl)oxazole

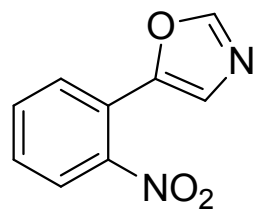

151.678  
147.385  
146.471  
132.647  
129.831  
129.664  
125.775  
124.430  
121.488

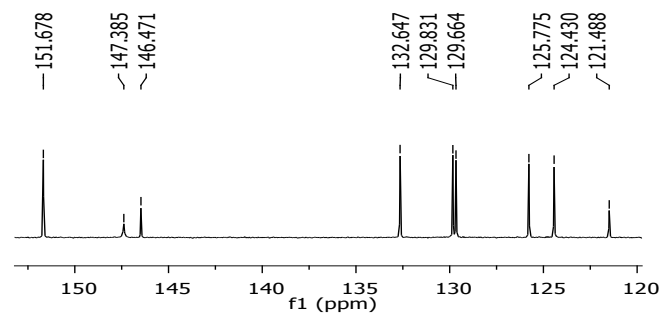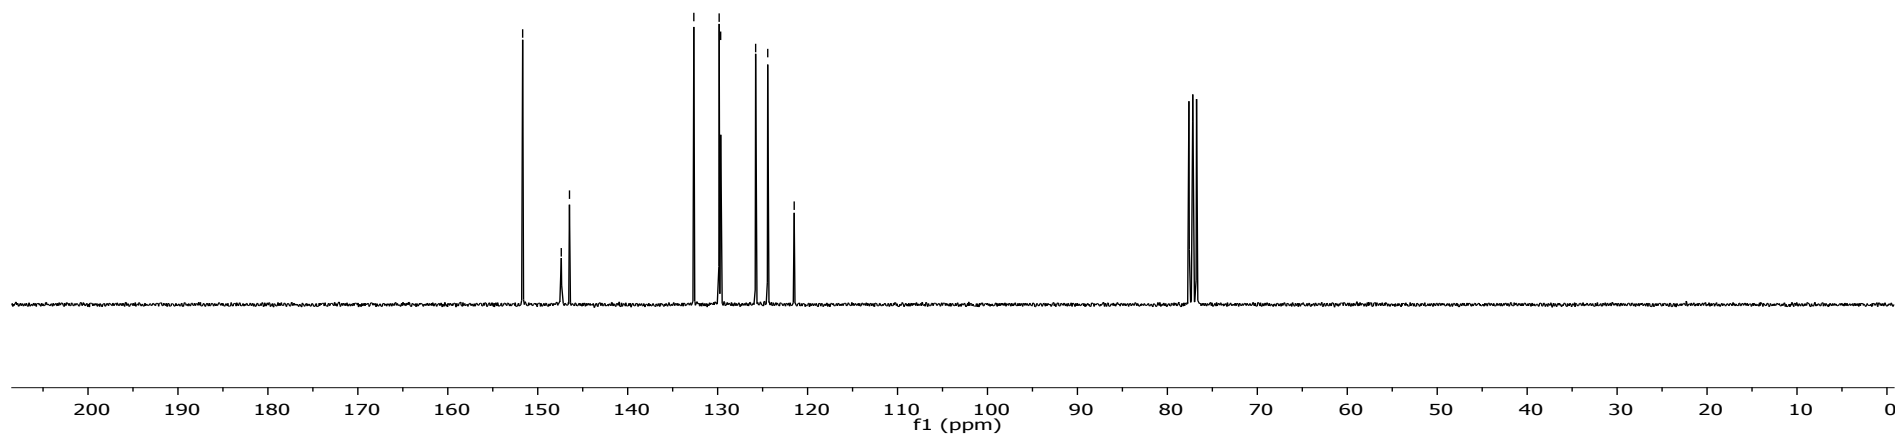

**<sup>1</sup>H-NMR(300 MHz, DMSO-d<sub>6</sub>) 2-(oxazol-5-yl)aniline (3)**

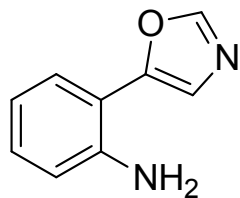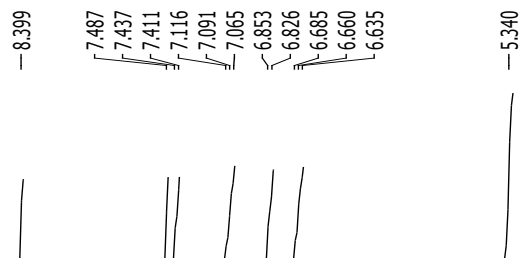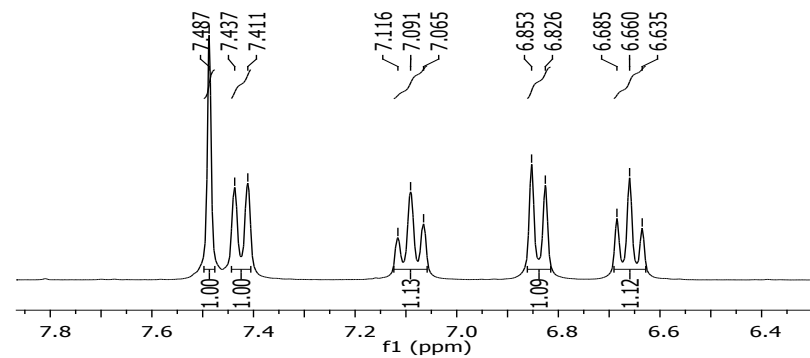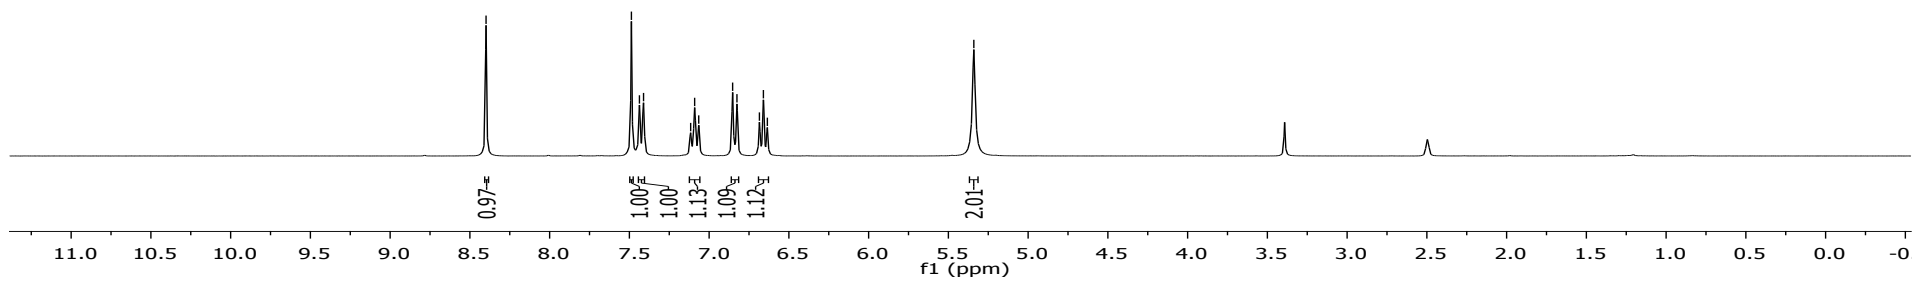

**<sup>13</sup>C-NMR(75.5 MHz, DMSO-d<sub>6</sub>) 2-(oxazol-5-yl)aniline**

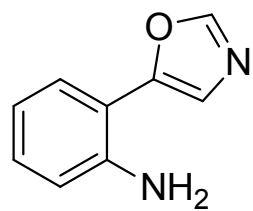

151.113  
149.743  
145.378  
129.873  
127.274  
122.638  
117.079  
116.910  
111.993

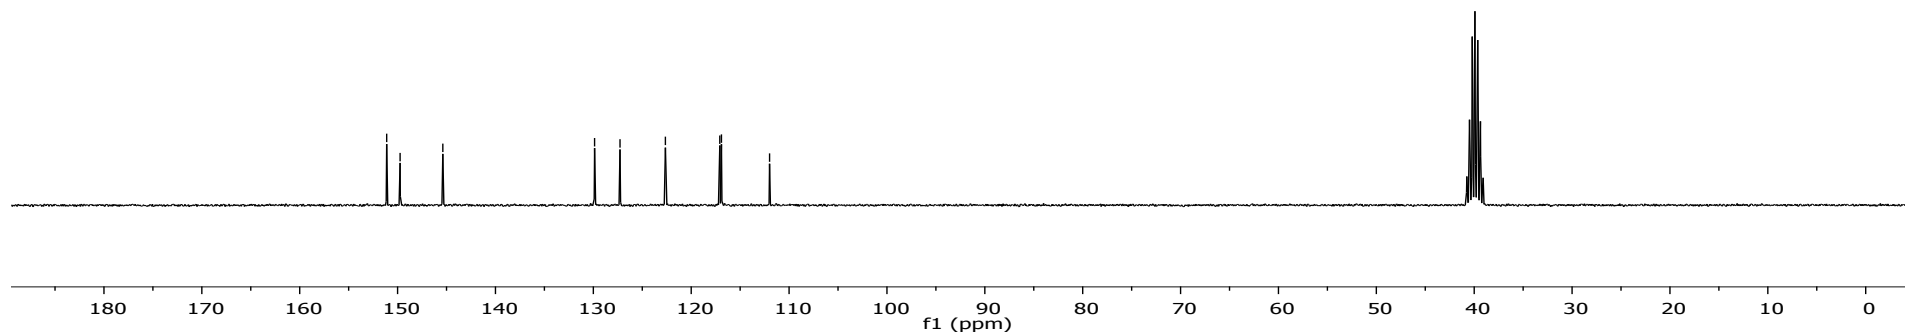

**<sup>1</sup>H-NMR(300 MHz, DMSO-d<sub>6</sub>) 3-(oxazol-5-yl)pyridin-2-amine (6)**

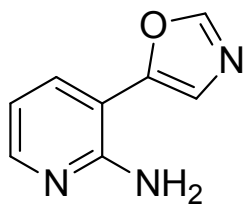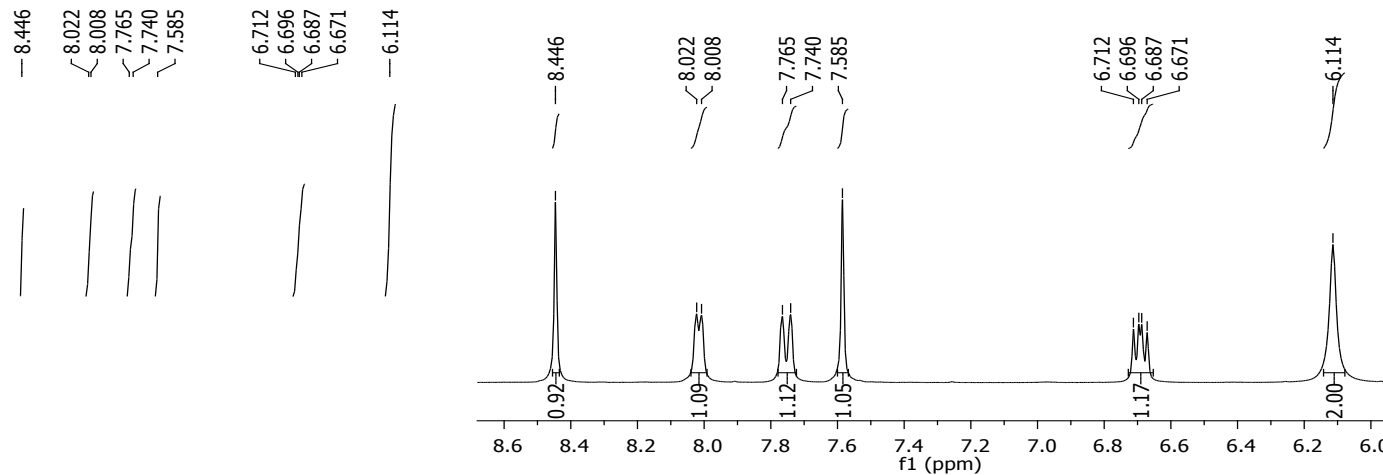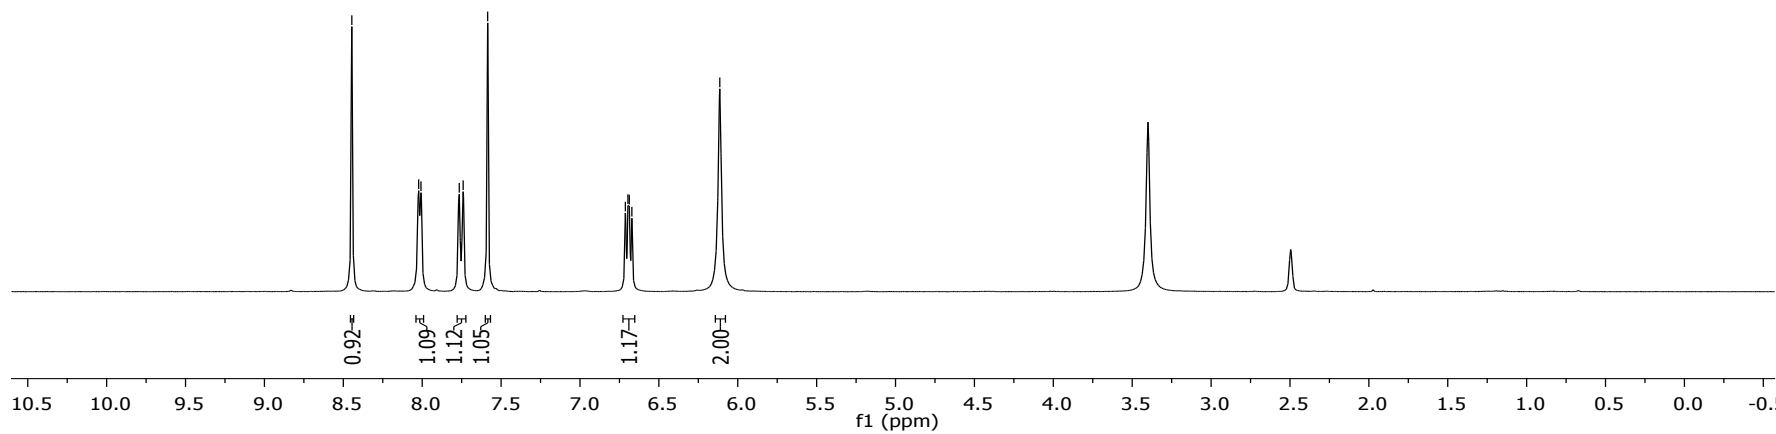



**<sup>13</sup>C-NMR(75.5 MHz, DMSO-d<sub>6</sub>) 3-(oxazol-5-yl)pyridin-2-amine**

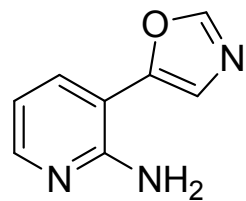

155.460  
151.836  
148.896  
148.101  
135.290  
123.441  
113.253  
107.078

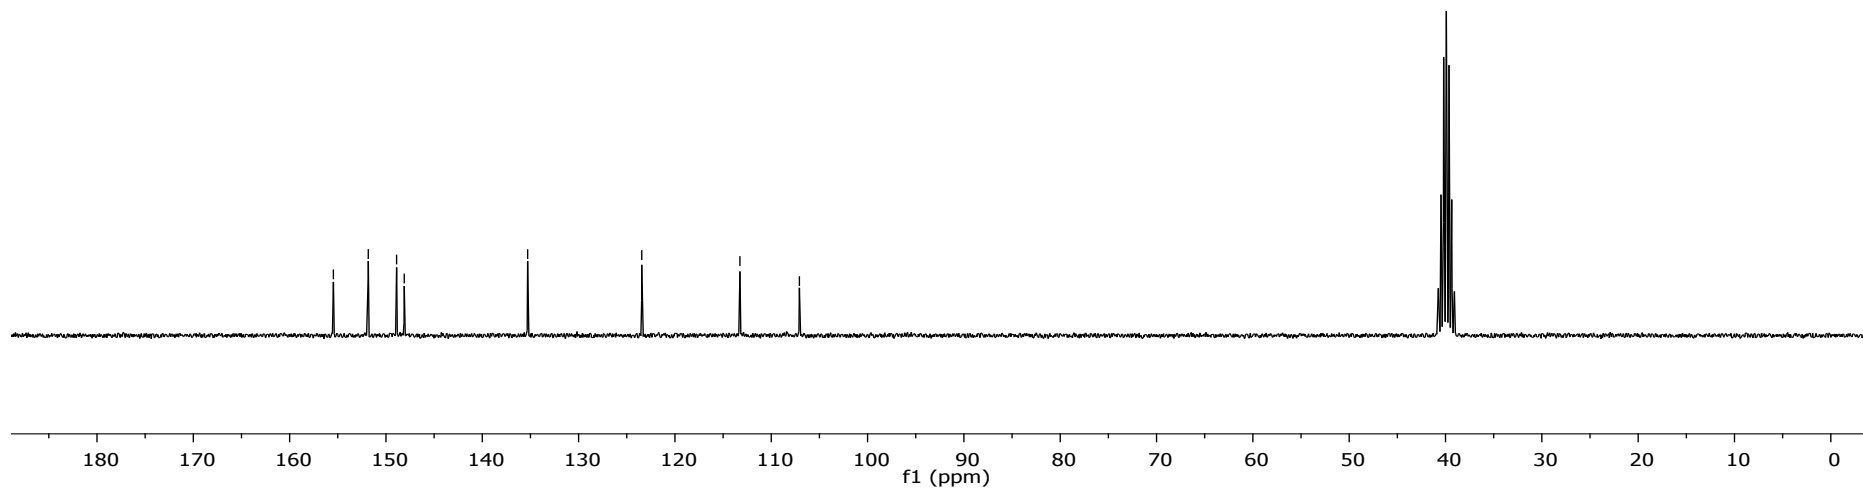

**<sup>1</sup>H-NMR(300 MHz, DMSO-d<sub>6</sub>) 4-phenyloxazo[4,5-c]quinoline (4a)**

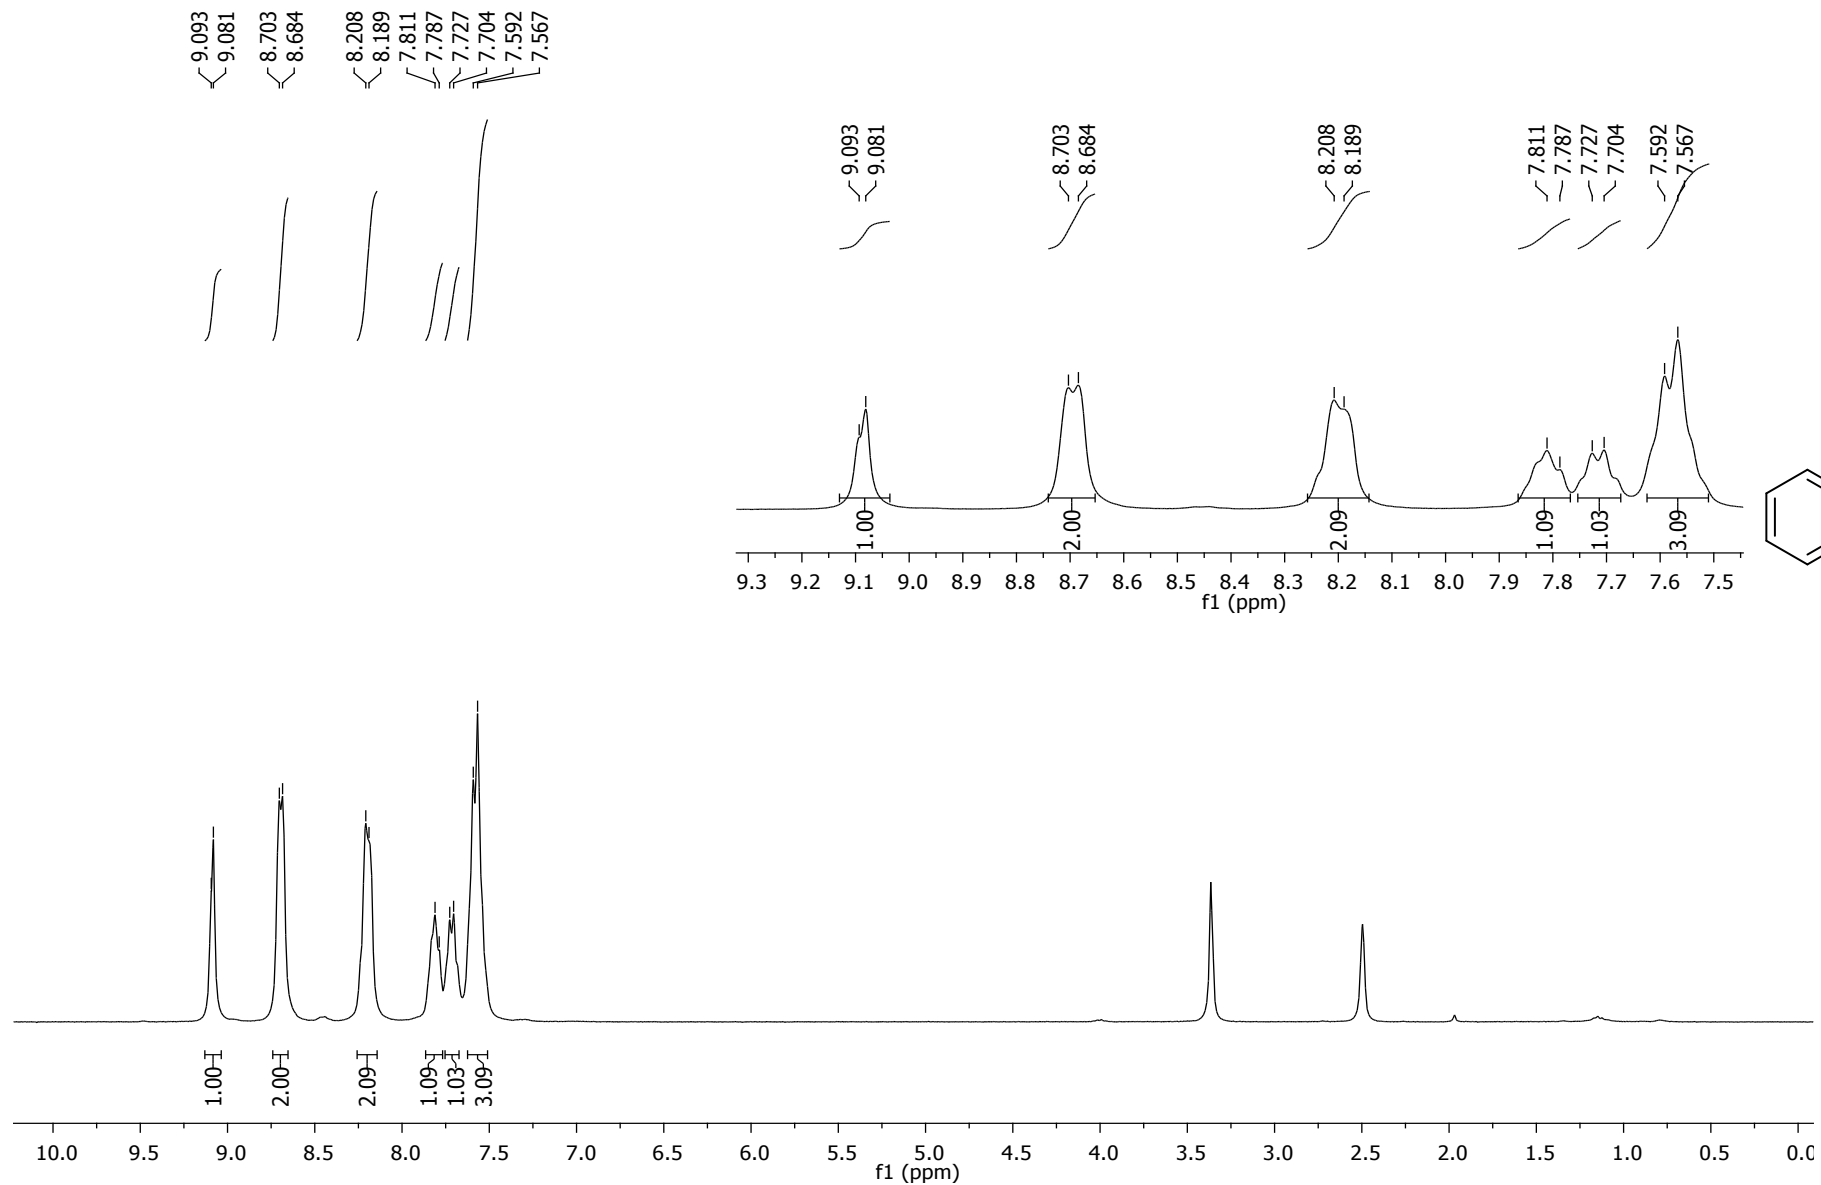

# <sup>13</sup>C-NMR(75.5 MHz, DMSO-d<sub>6</sub>) 4-phenyloxazo[4,5-c]quinoline (4a)

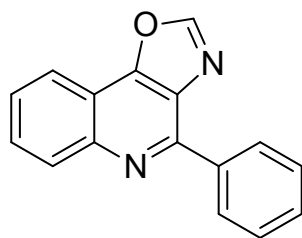

~154.233  
~152.205  
~149.851  
~145.382  
136.800  
131.862  
130.629  
130.043  
129.466  
128.987  
127.929  
—120.603  
—115.621

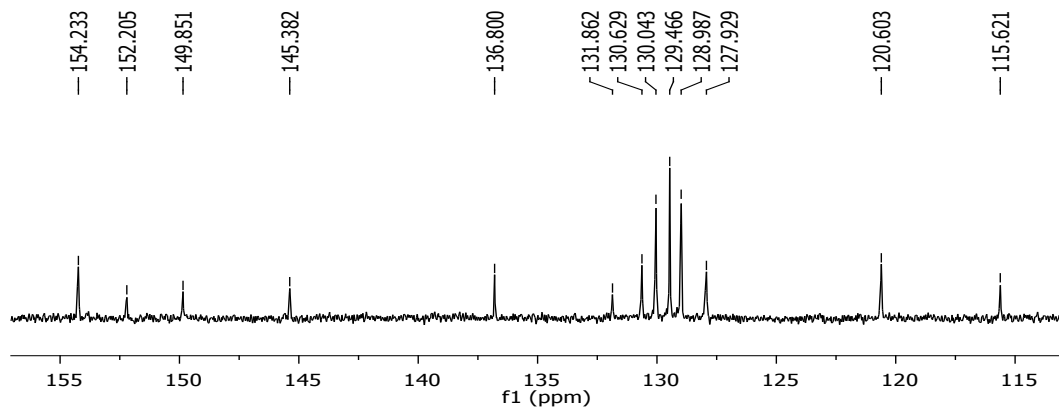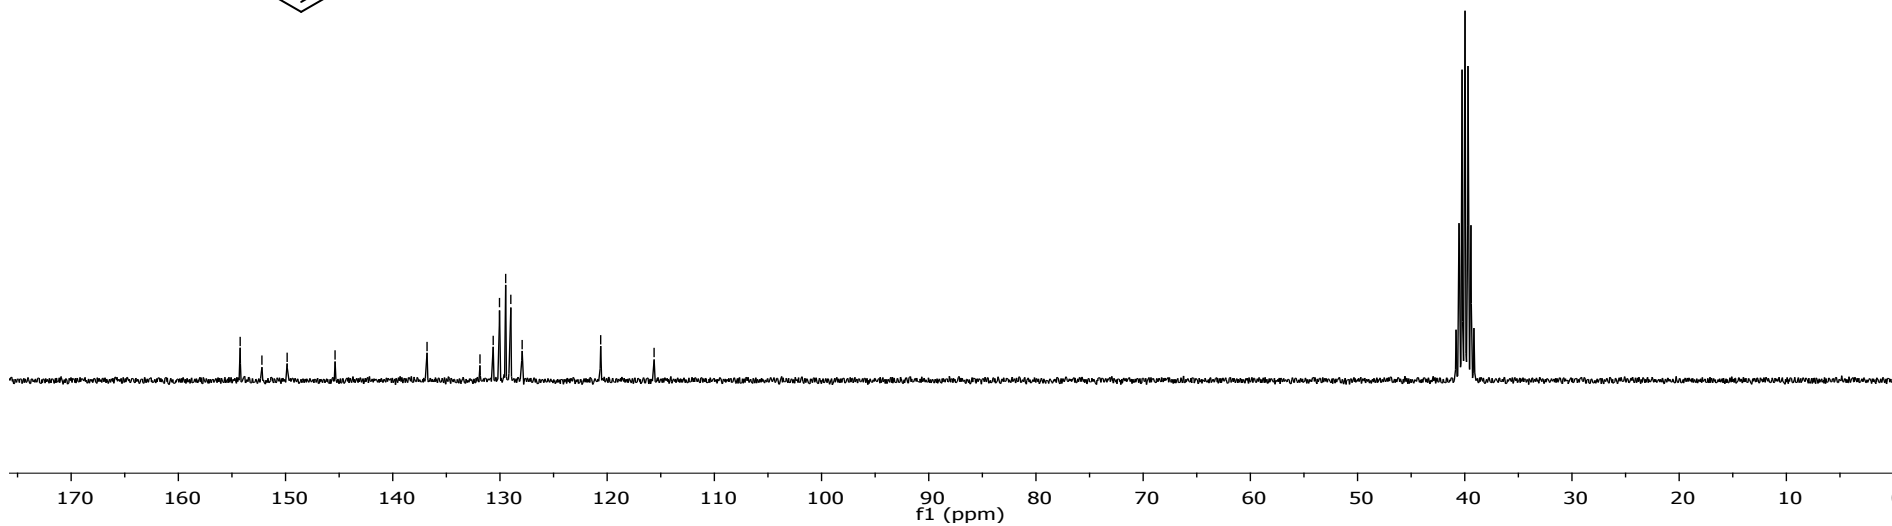

<sup>13</sup>C-NMR(75.5 MHz, DMSO-d<sub>6</sub>) 4-(4-nitrophenyl)oxazolo[4,5-c]quinoline (4b)

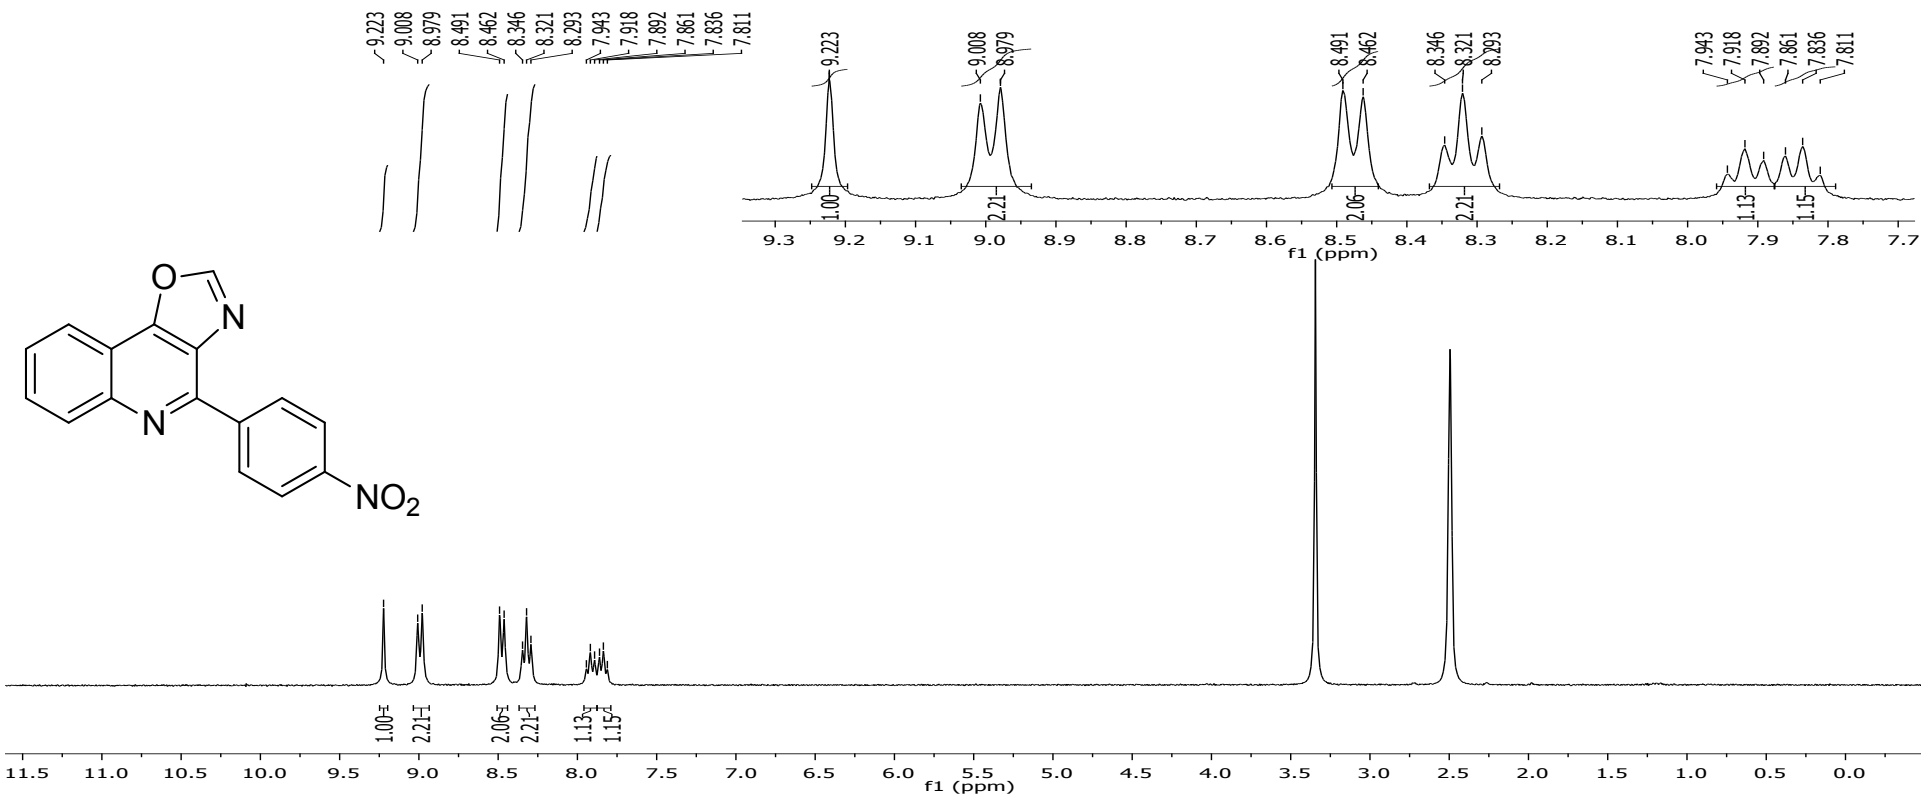

**<sup>13</sup>C-NMR(75.5 MHz, DMSO-d<sub>6</sub>) 4-(4-nitrophenyl)oxazolo[4,5-c]quinoline (4b)**

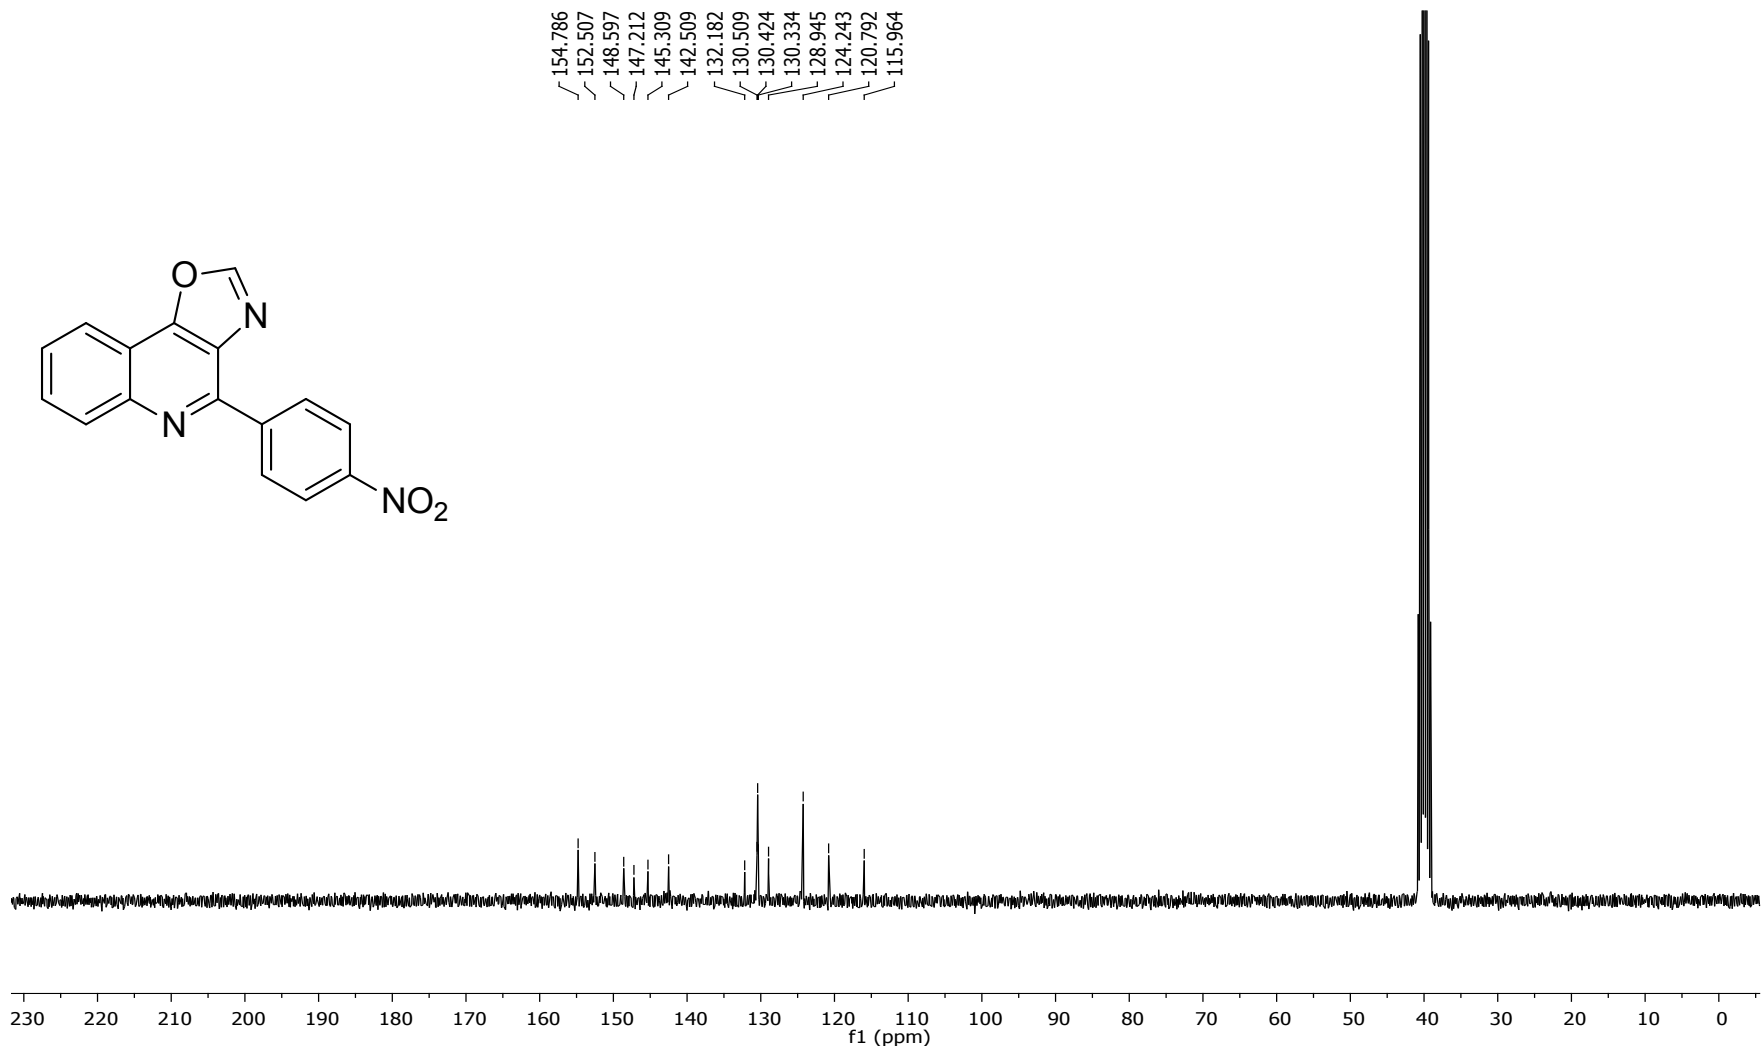

**<sup>1</sup>H-NMR(300 MHz, DMSO-d<sub>6</sub>) 4-(4-(trifluoromethyl)phenyl)oxazolo[4,5-c]quinoline (4c)**

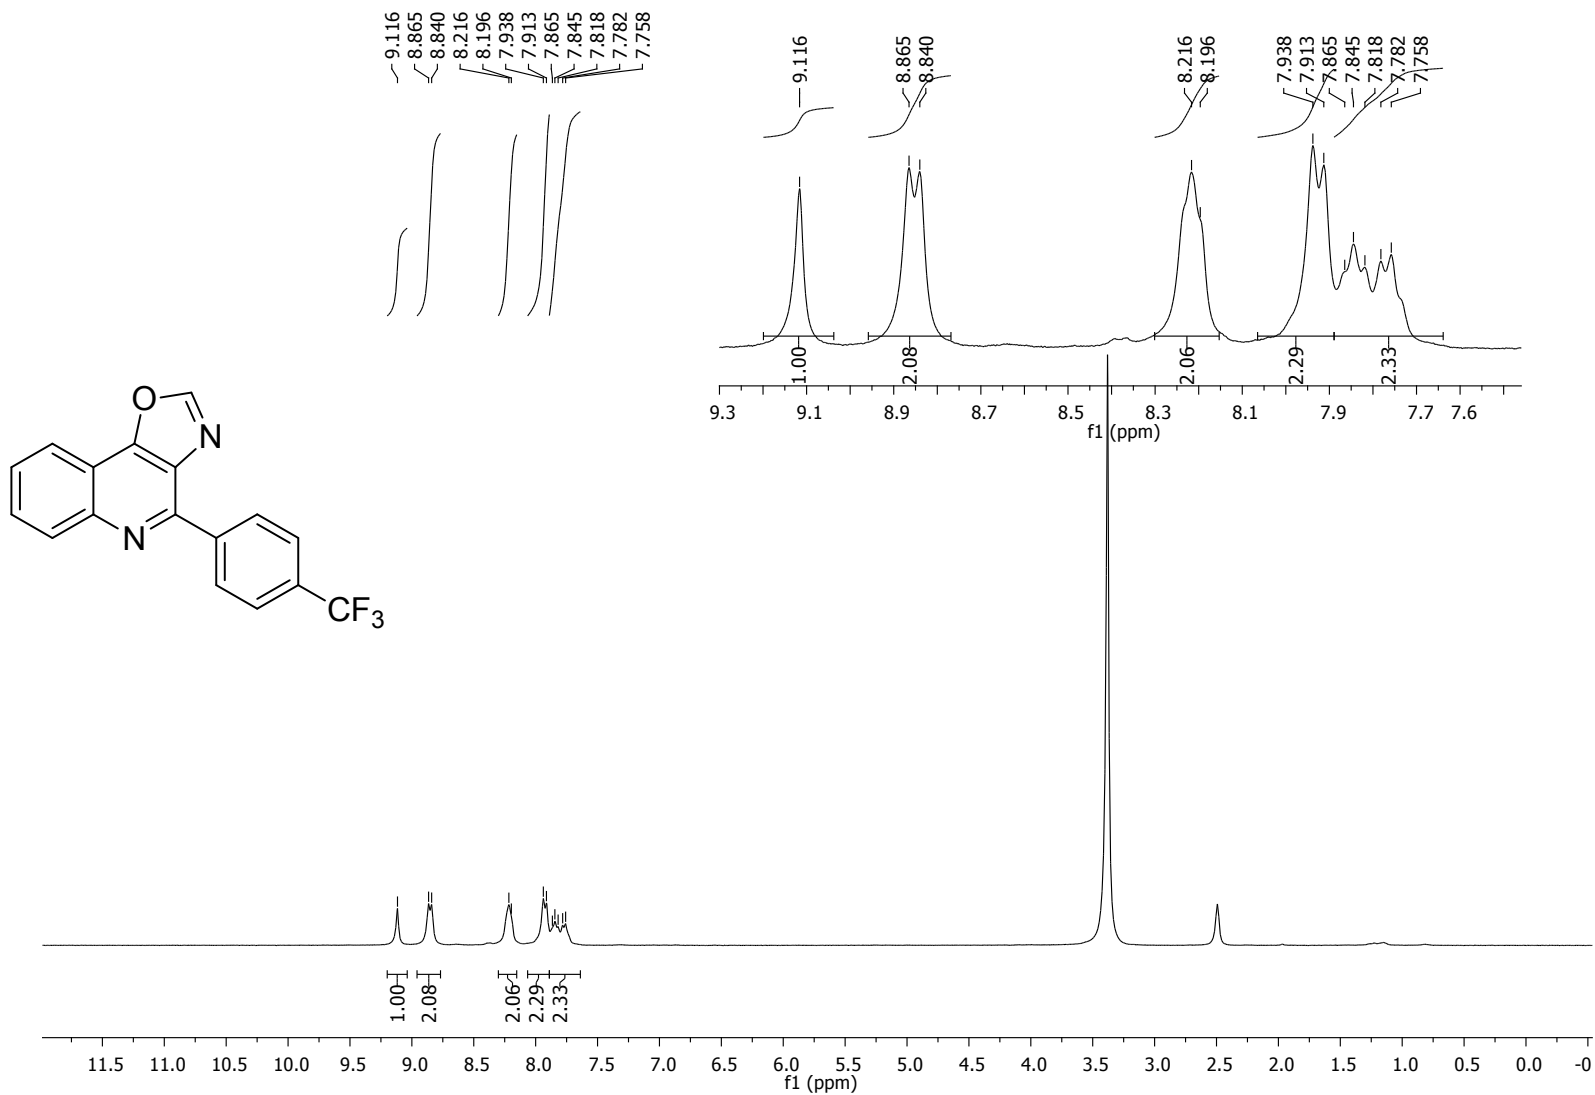

**<sup>13</sup>C-NMR(75.5 MHz, DMSO-d<sub>6</sub>) 4-(4-(trifluoromethyl)phenyl)oxazolo[4,5-c]quinoline (4c)**

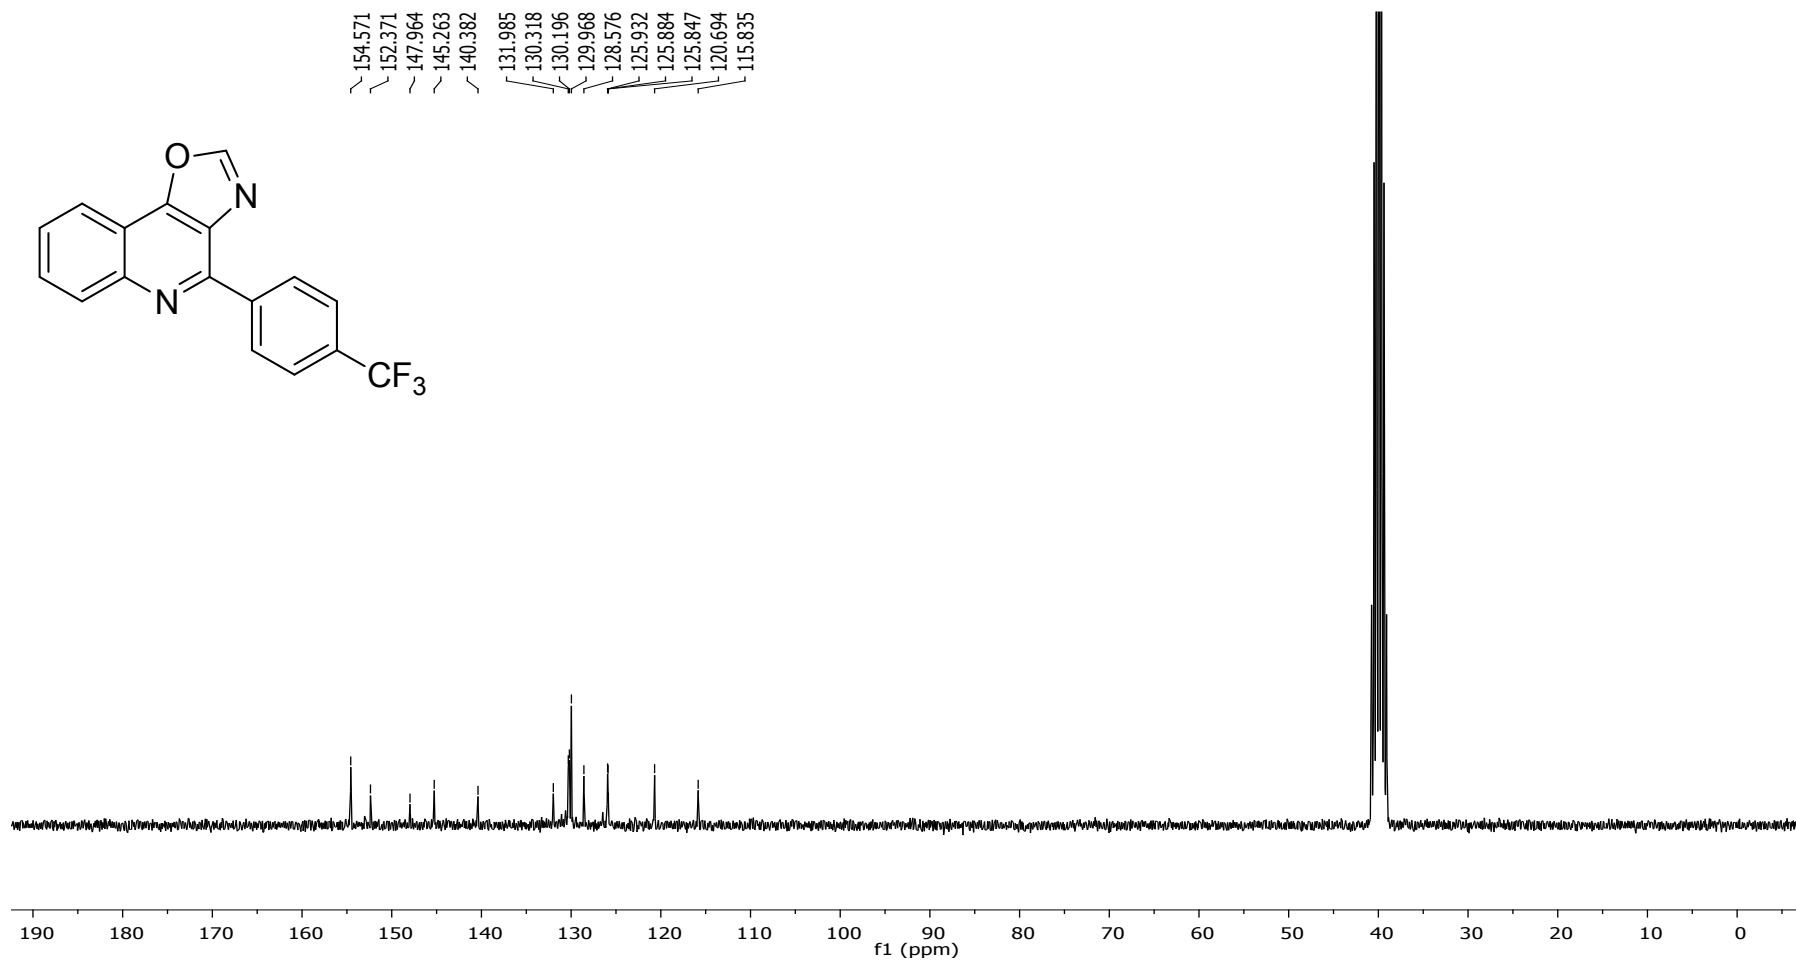

**<sup>1</sup>H NMR (300 MHz, CDCl<sub>3</sub>) 4-(thiophen-2-yl)oxazolo[4,5-c]quinoline (4d)**

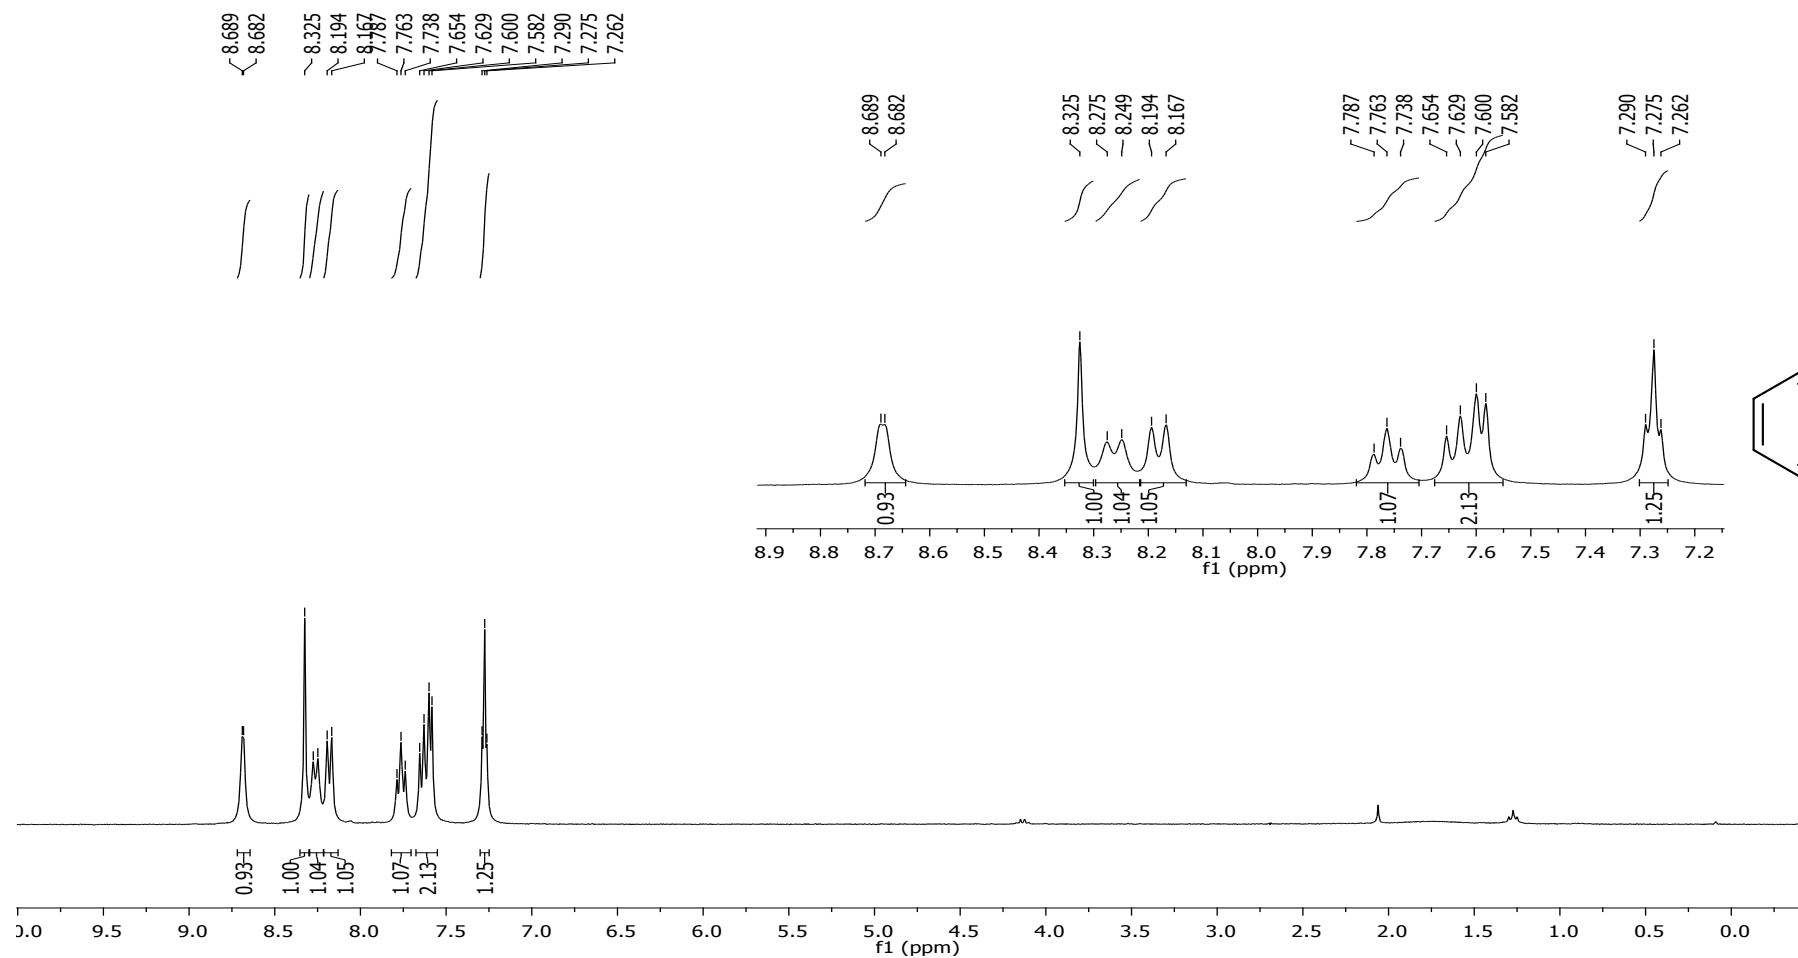



**<sup>13</sup>C NMR (75.5 MHz, CDCl<sub>3</sub>) 4-(thiophen-2-yl)oxazolo[4,5-c]quinoline (4d)**

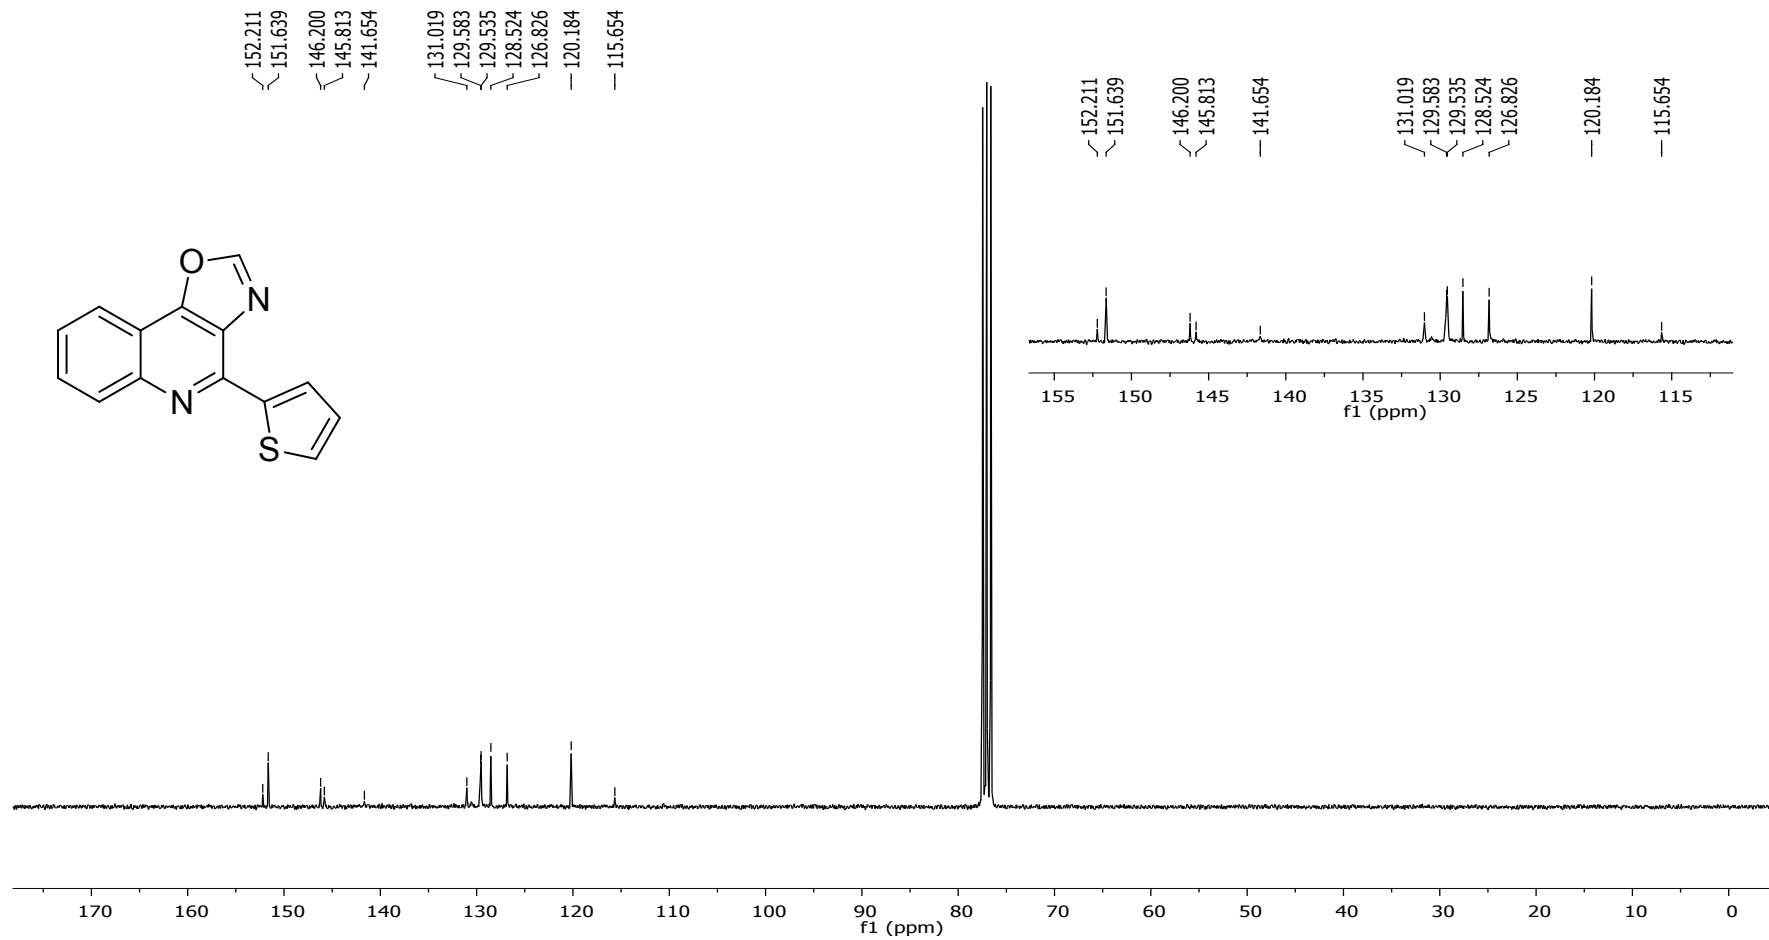

**<sup>1</sup>H NMR (300 MHz, CDCl<sub>3</sub>) 4-(4-methoxyphenyl)oxazolo[4,5-c]quinoline (4e)**

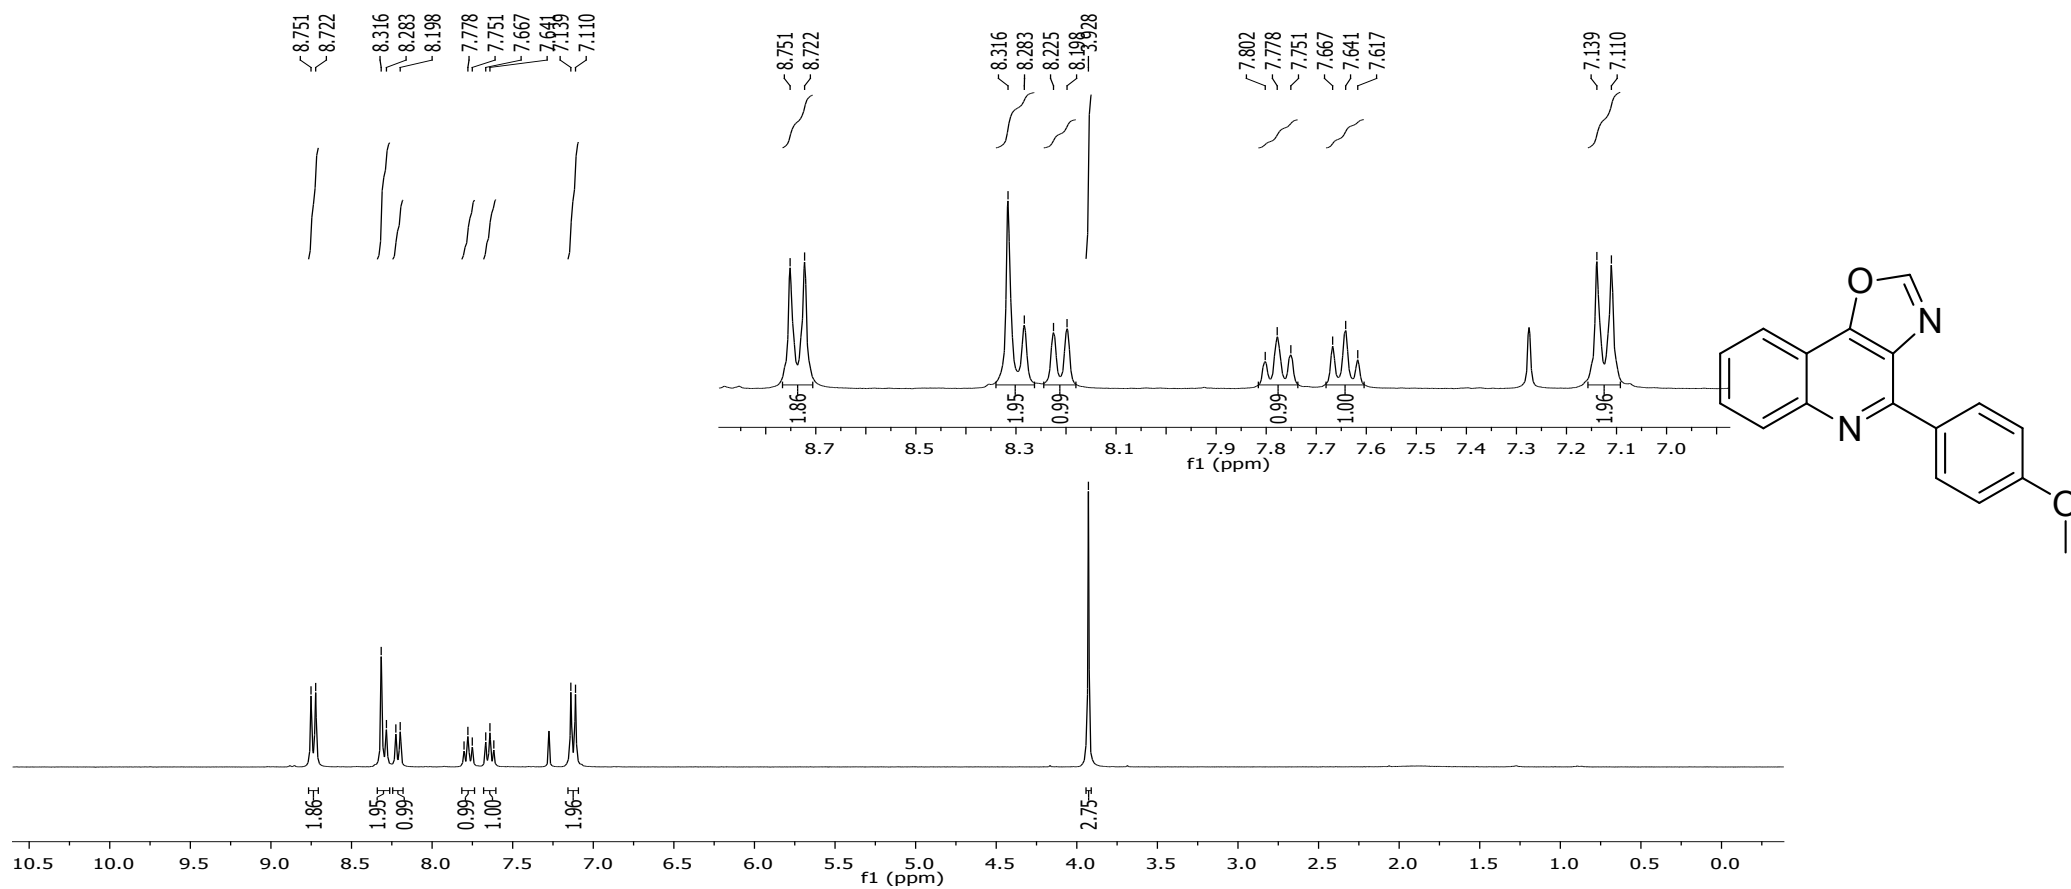

**<sup>13</sup>C NMR(75.5 MHz, CDCl<sub>3</sub>) 4-(4-methoxyphenyl)oxazolo[4,5-c]quinoline (4e)**

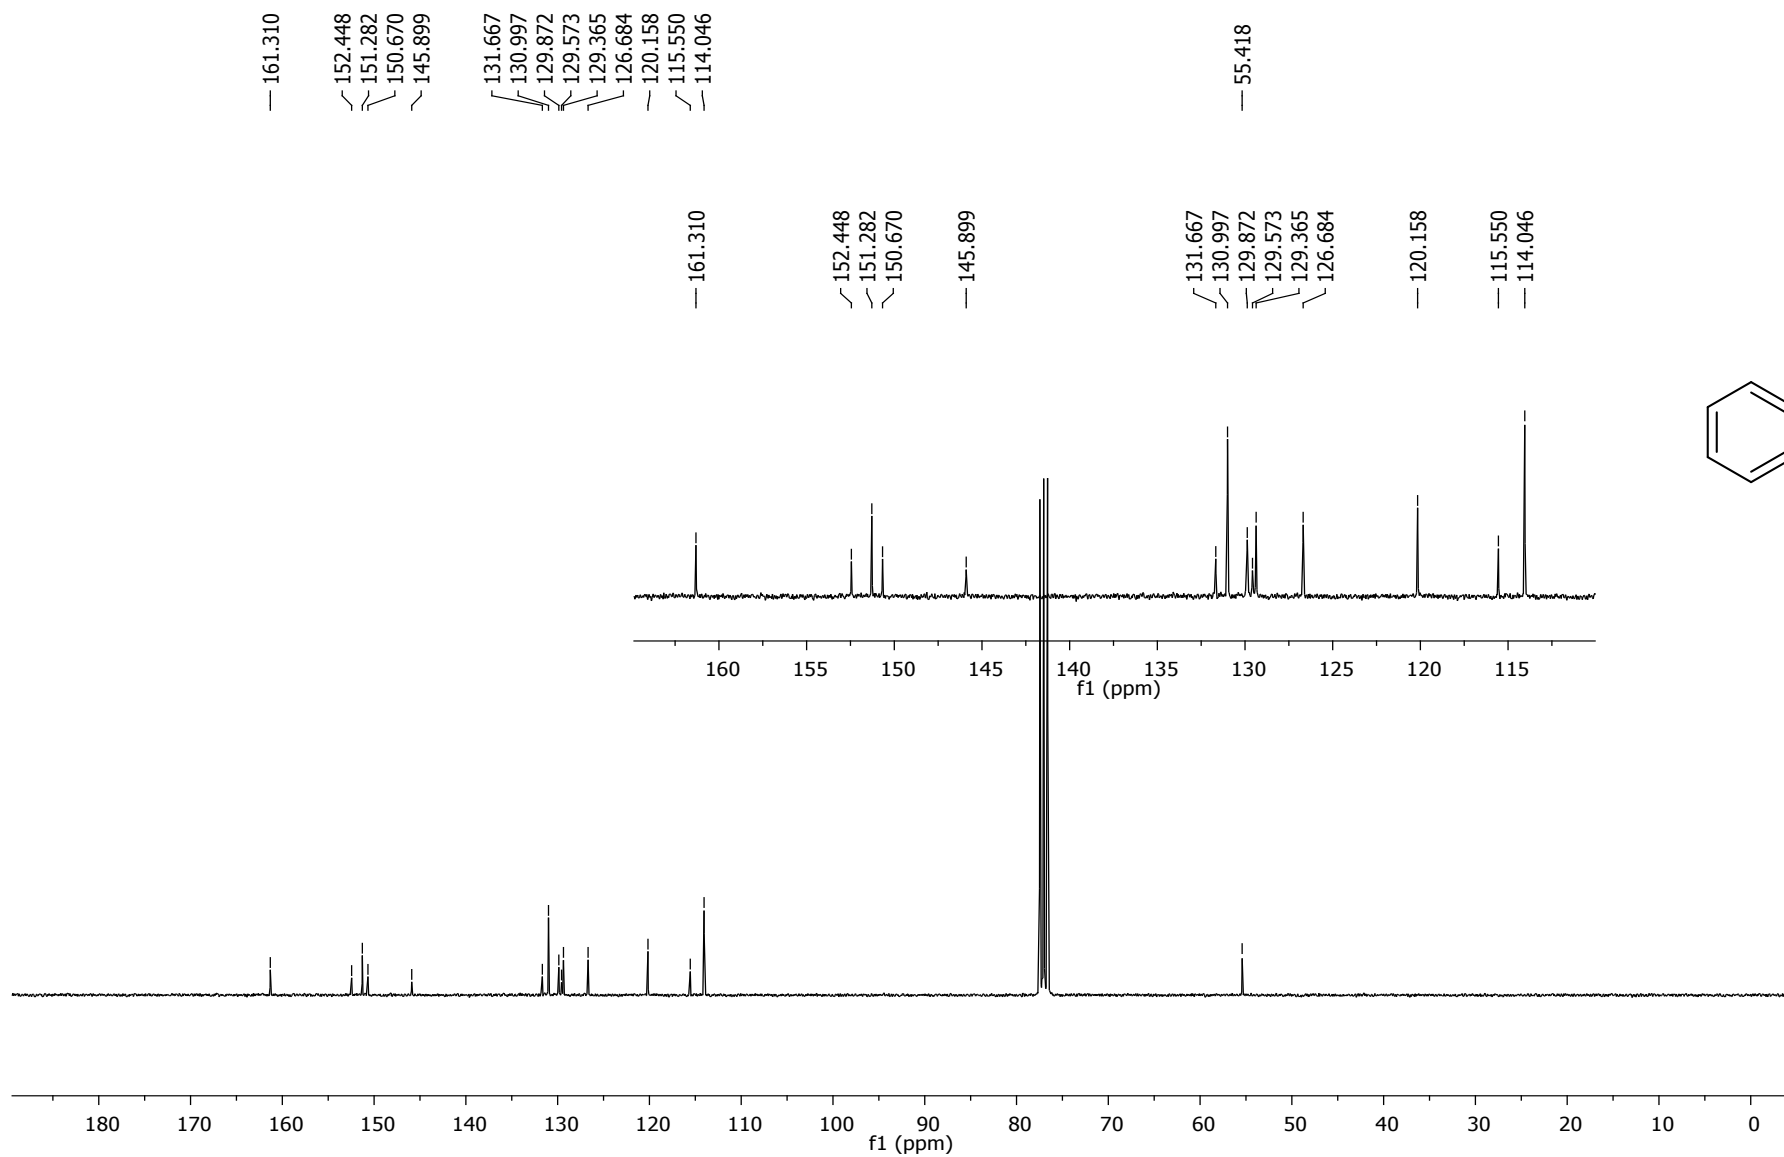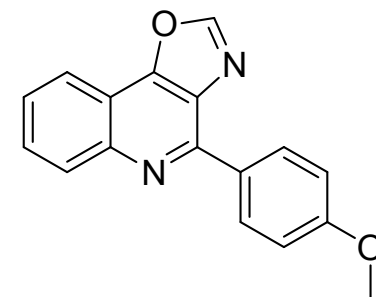

**<sup>1</sup>H-NMR(300 MHz, DMSO-d<sub>6</sub>) 2-(oxazolo[4,5-c]quinolin-4-yl)phenol (4f)**

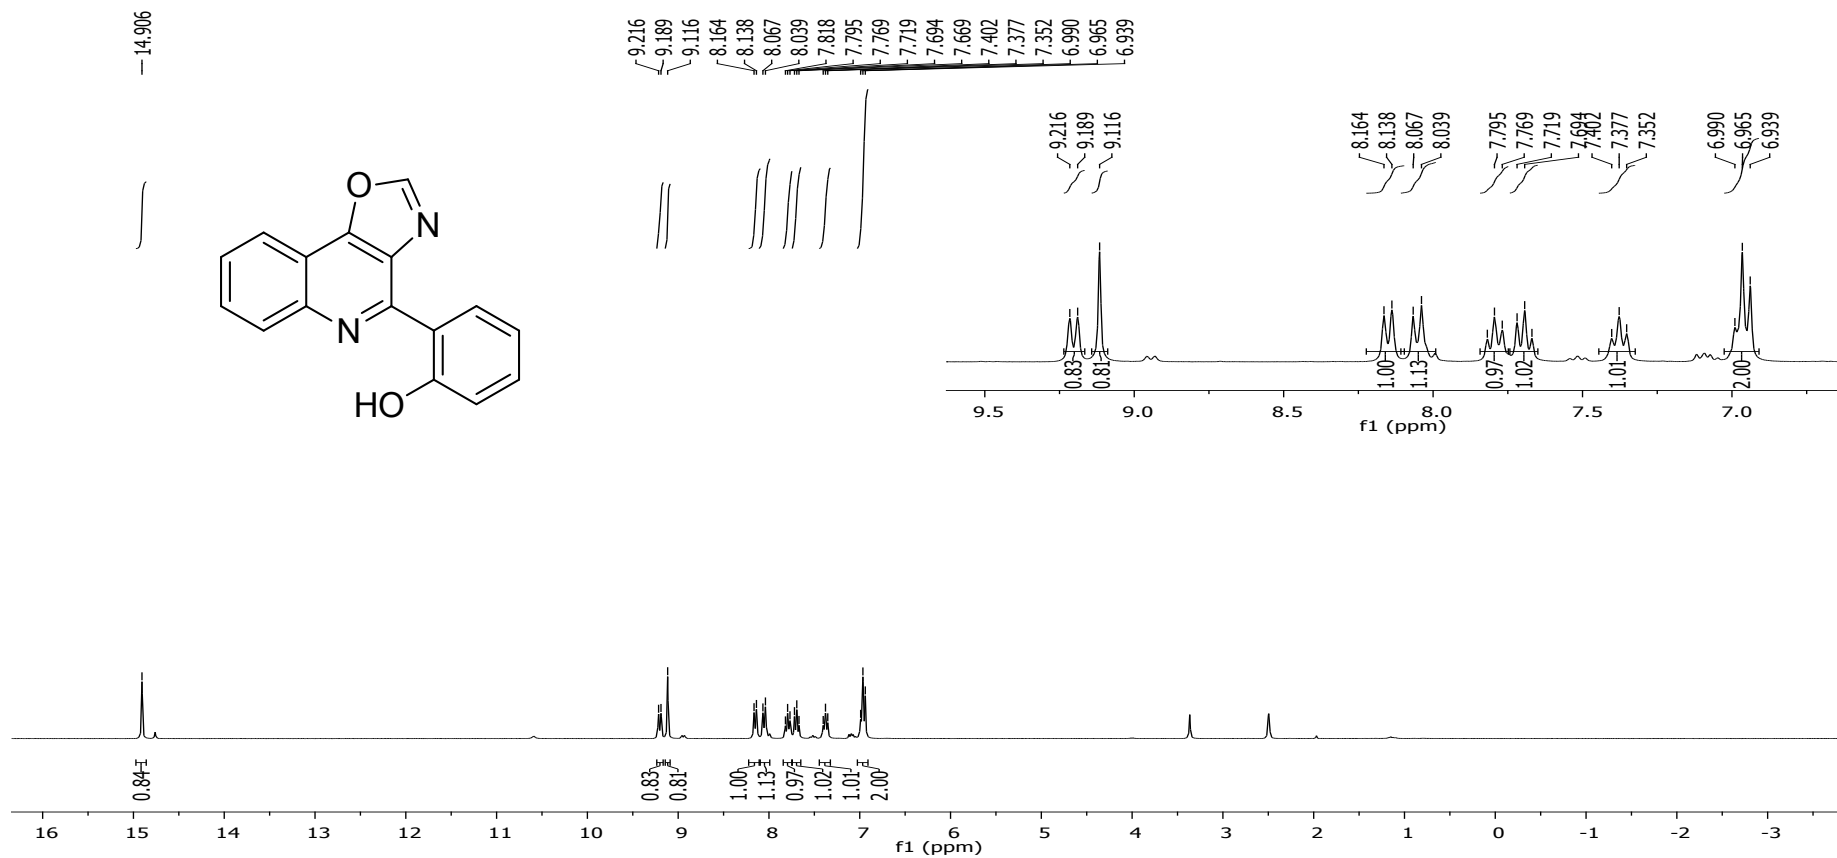

**<sup>13</sup>C-NMR(75.5 MHz, DMSO-d<sub>6</sub>) 2-(oxazolo[4,5-c]quinolin-4-yl)phenol (4f)**

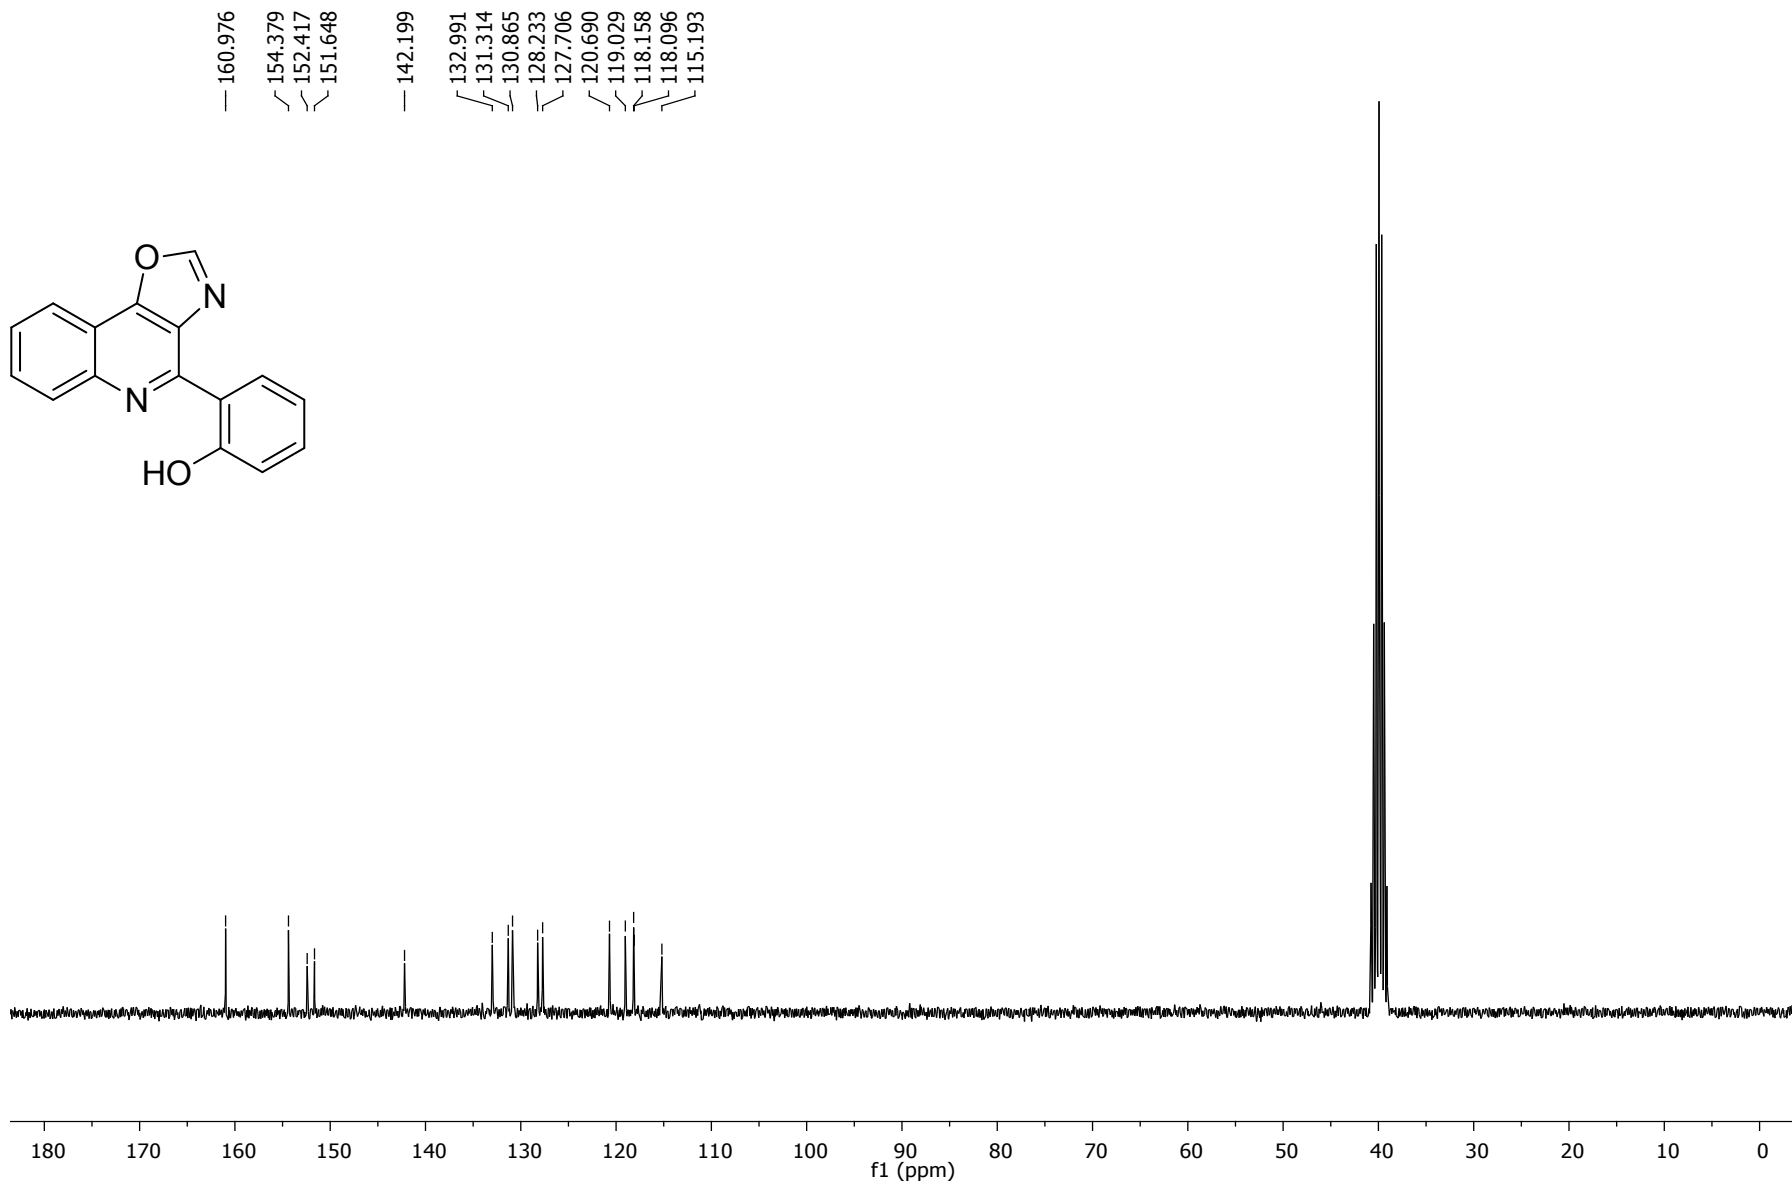

**<sup>1</sup>H NMR (300 MHz, CDCl<sub>3</sub>) 4-(3,4-dimethoxyphenyl)oxazolo[4,5-c]quinoline (4g)**

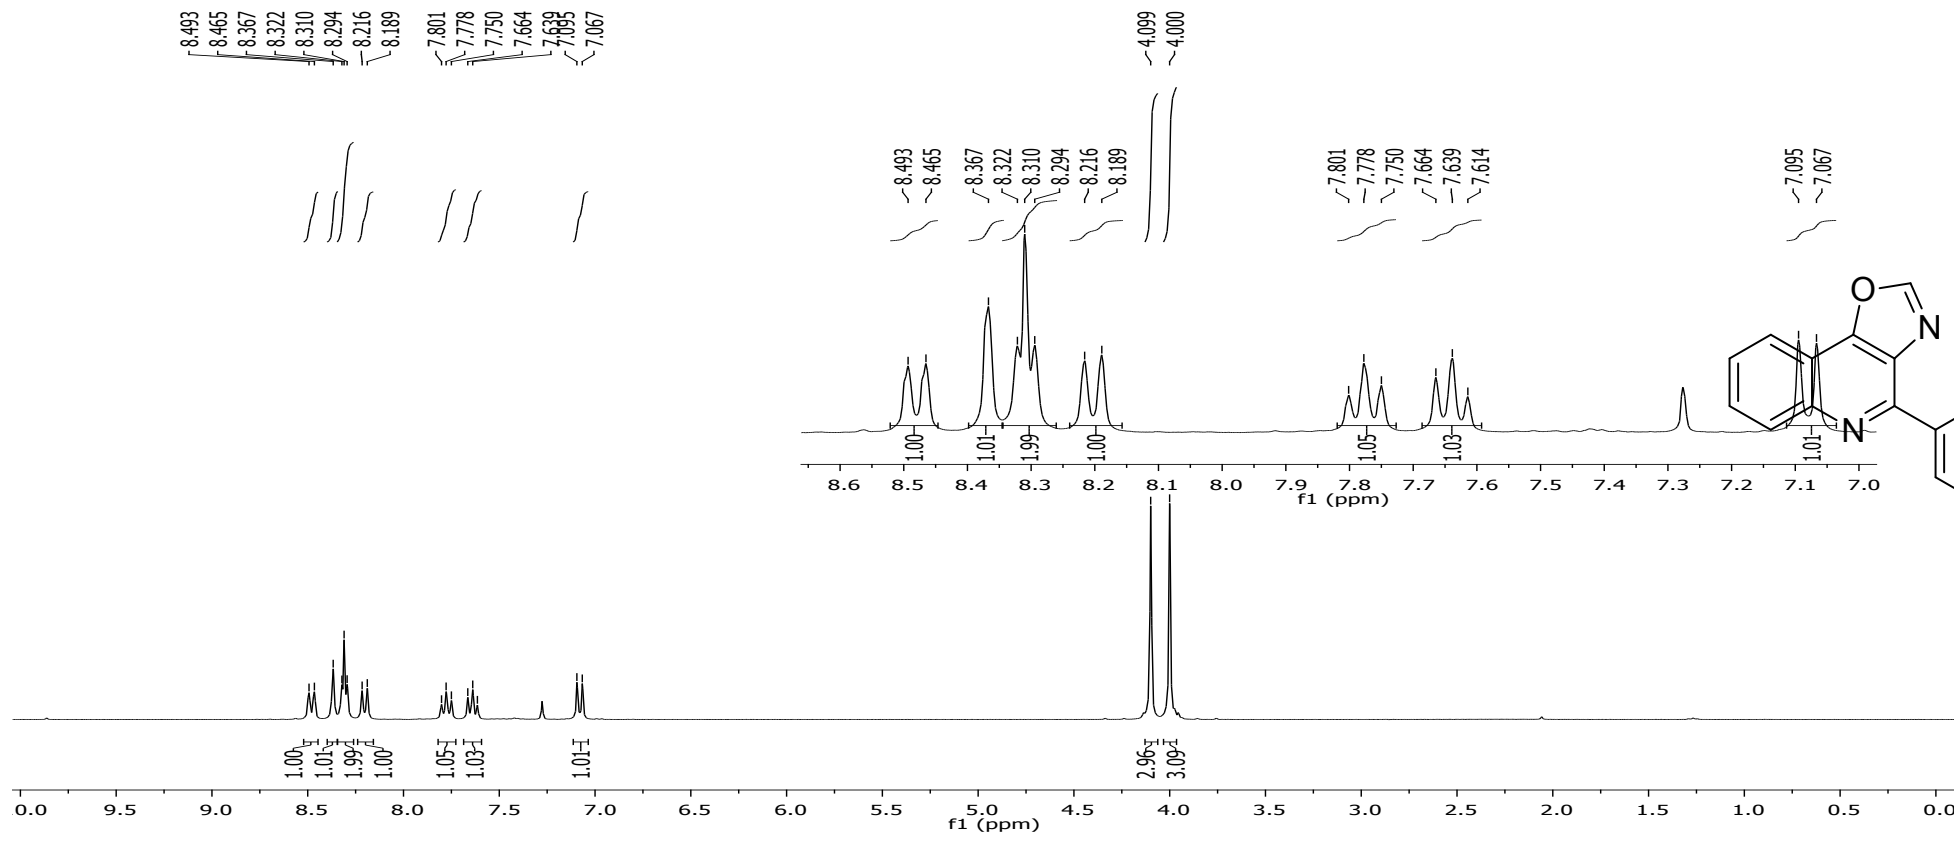

**<sup>13</sup>C NMR(75.5 MHz, CDCl<sub>3</sub>) 4-(3,4-dimethoxyphenyl)oxazolo[4,5-c]quinoline (4g)**

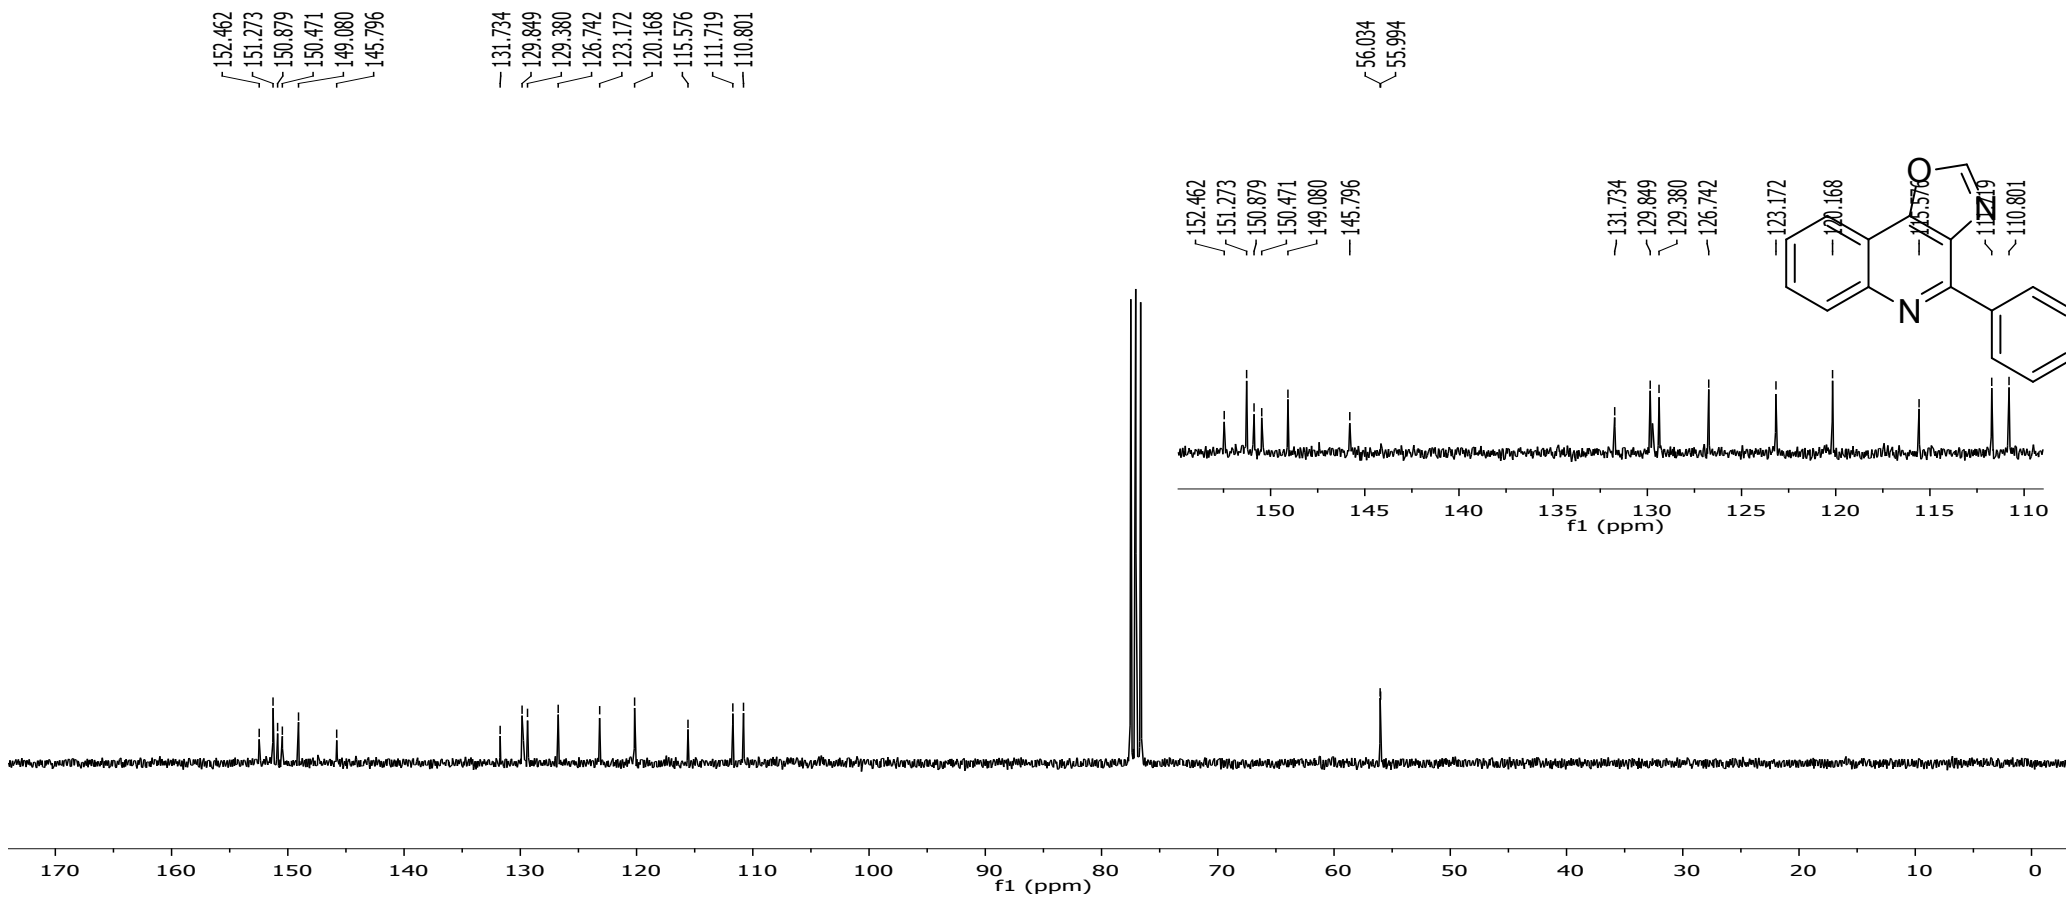

**<sup>1</sup>H NMR (300 MHz, CDCl<sub>3</sub>) 4-(4-chlorophenyl)oxazolo[4,5-*c*]quinoline (4h)**



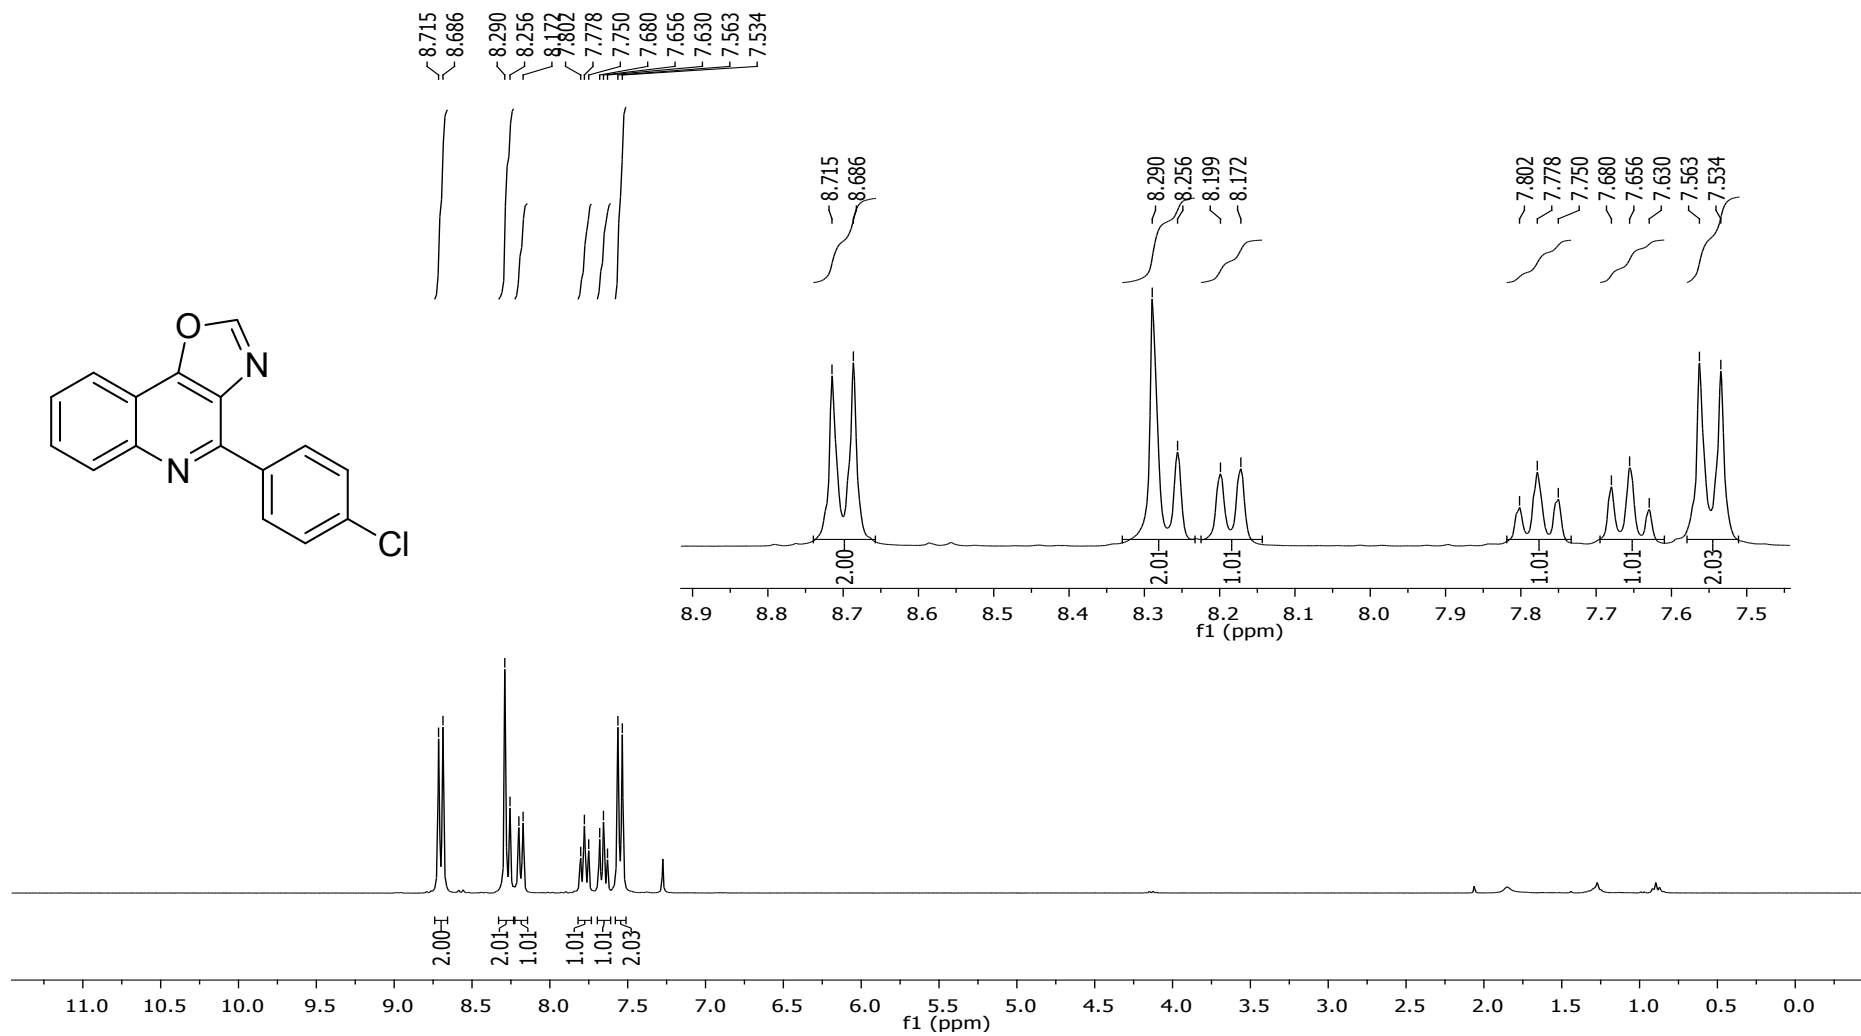

**<sup>13</sup>C NMR(75.5 MHz, CDCl<sub>3</sub>) 4-(4-chlorophenyl)oxazolo[4,5-*c*]quinoline (4h)**

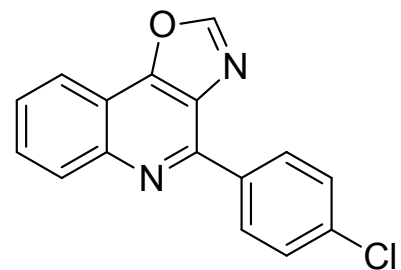

152.485  
151.421  
149.464  
145.758  
136.259  
135.263  
130.681  
130.085  
129.510  
128.808  
127.493  
115.740

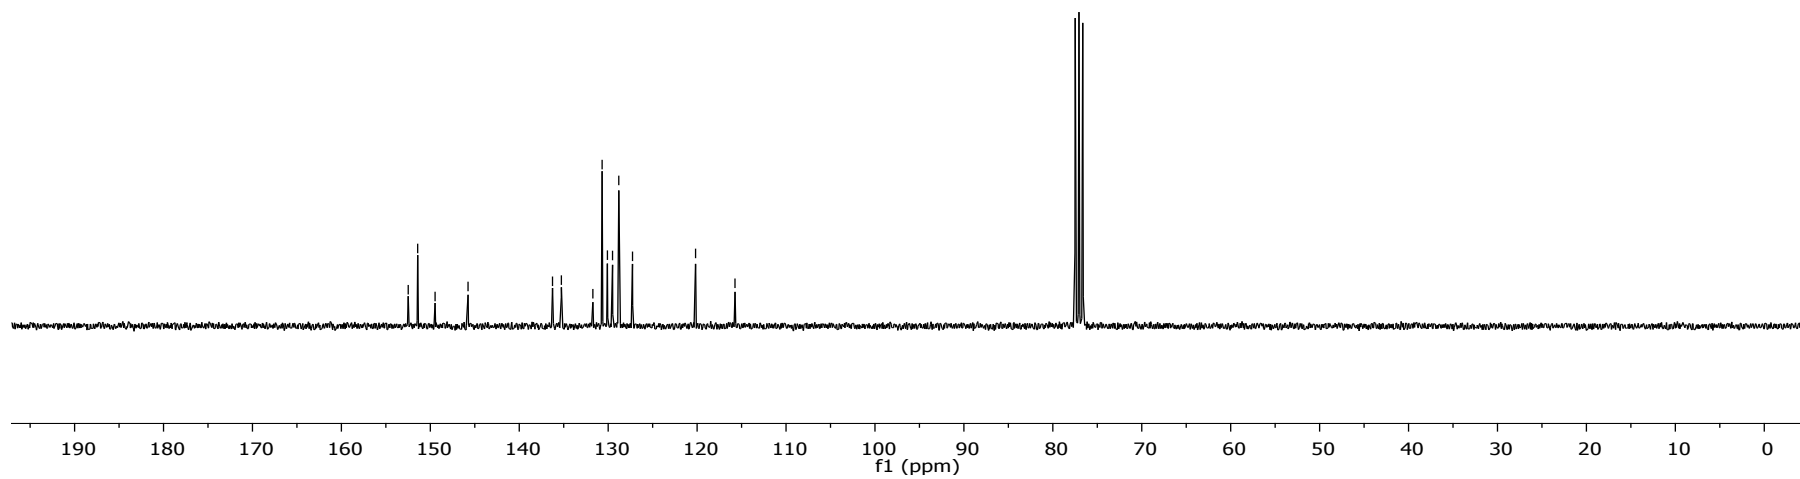

**<sup>1</sup>H NMR (300 MHz, CDCl<sub>3</sub>) 4-(4-fluorophenyl)oxazolo[4,5-*c*]quinoline (4i)**

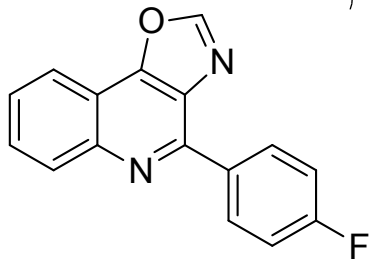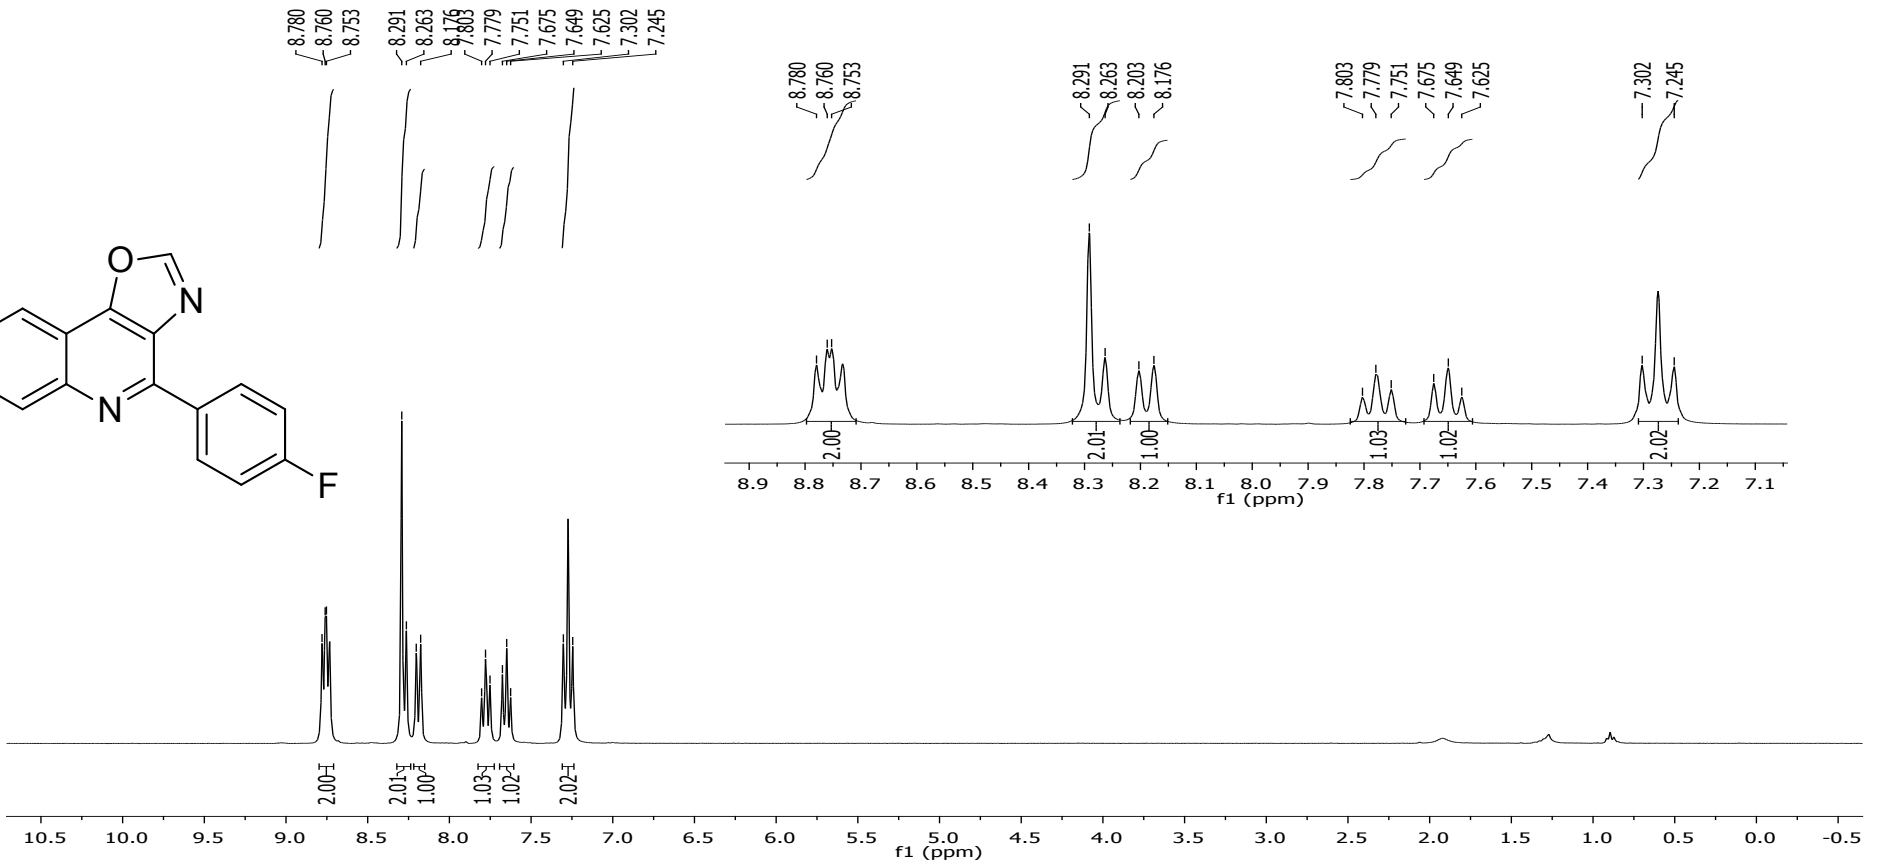

**<sup>13</sup>C NMR(75.5 MHz, CDCl<sub>3</sub>) 4-(4-fluorophenyl)oxazolo[4,5-c]quinoline (4i)**

— 165.818 — 162.501  
/ 152.505 \  
/ 151.435 \  
/ 149.704 \  
/ 145.725 \  
/ 131.656 \  
/ 131.536 \  
/ 131.422 \  
/ 129.973 \  
/ 129.513 \  
/ 127.131 \  
/ 126.169 \  
/ 115.759 \  
/ 115.649 \  
/ 115.474 \

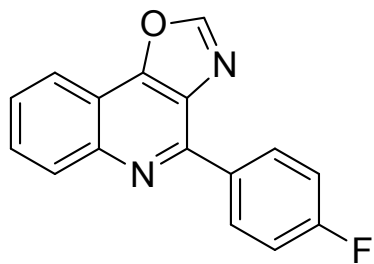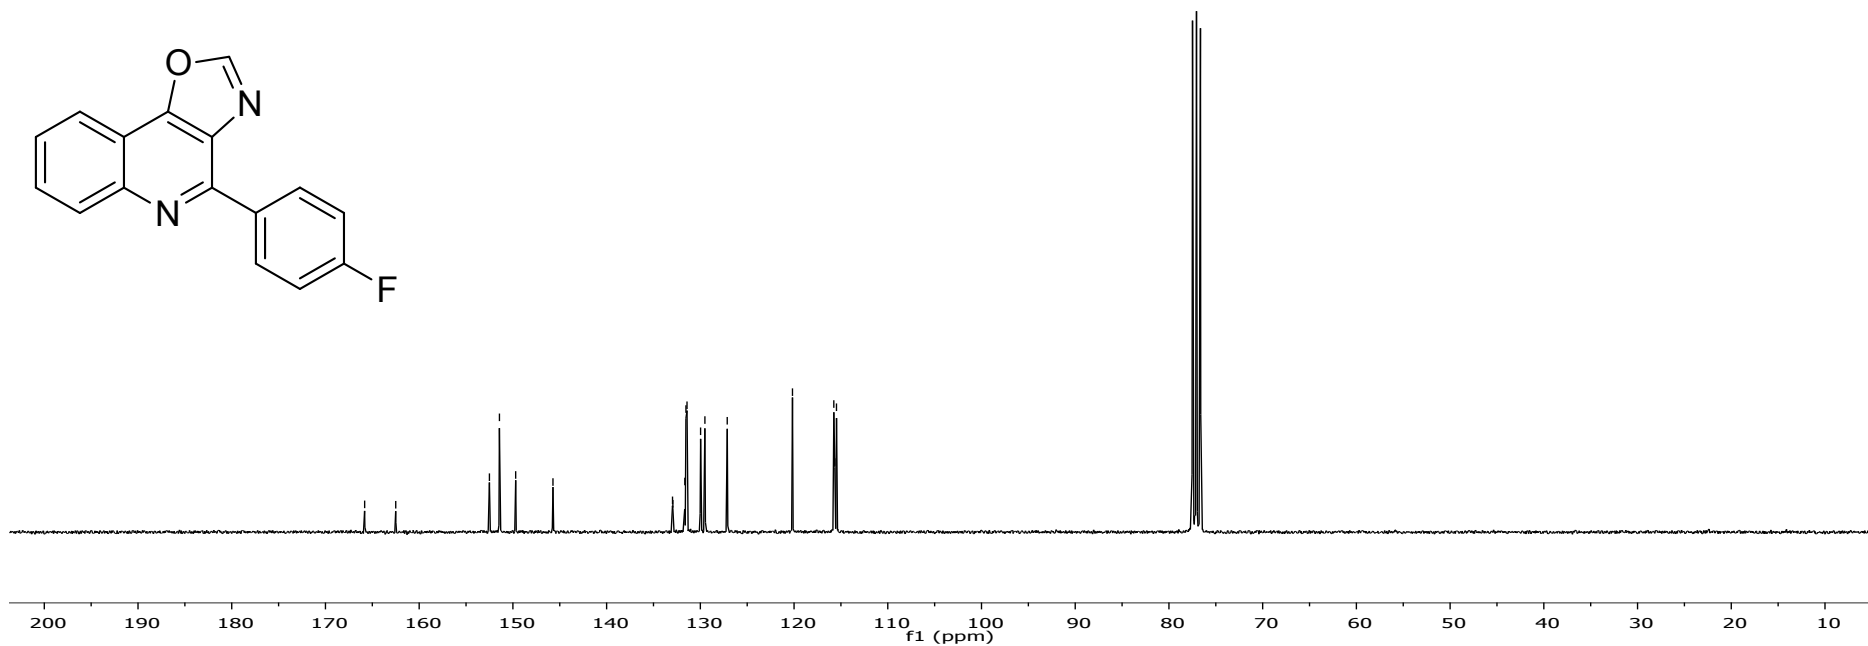

**<sup>1</sup>H NMR (300 MHz, CDCl<sub>3</sub>) 4-(4-bromophenyl)oxazolo[4,5-c]quinoline (4j)**

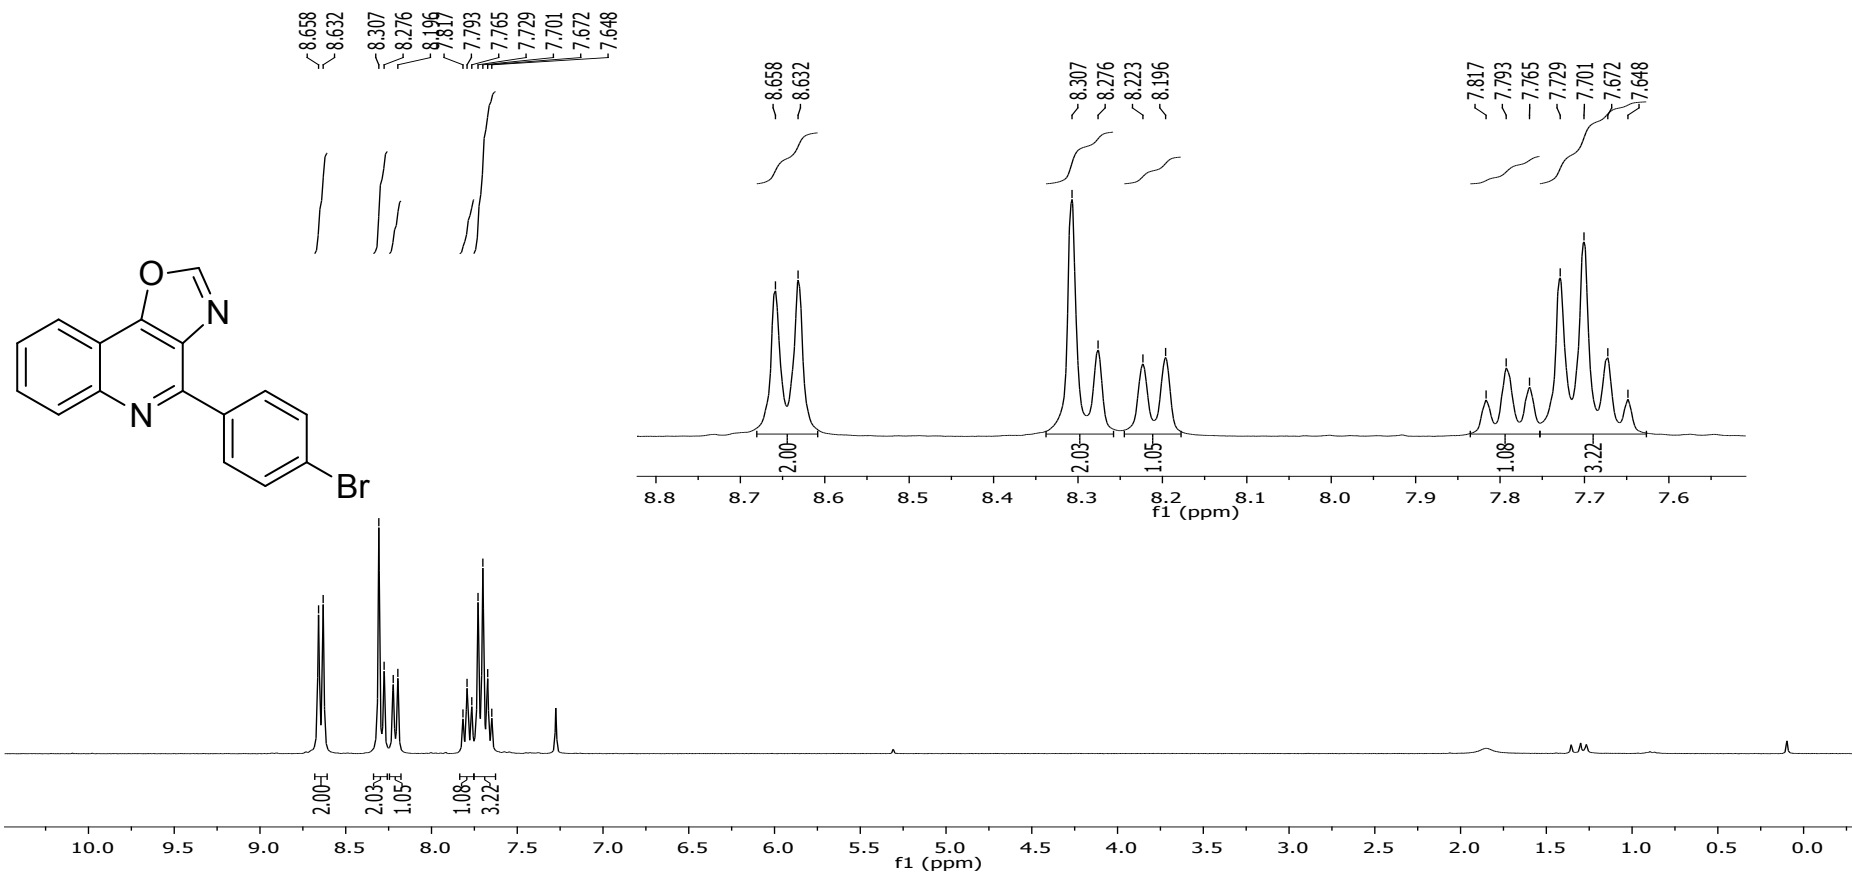

**<sup>13</sup>C NMR(75.5 MHz, CDCl<sub>3</sub>) 4-(4-bromophenyl)oxazolo[4,5-c]quinoline (4j)**

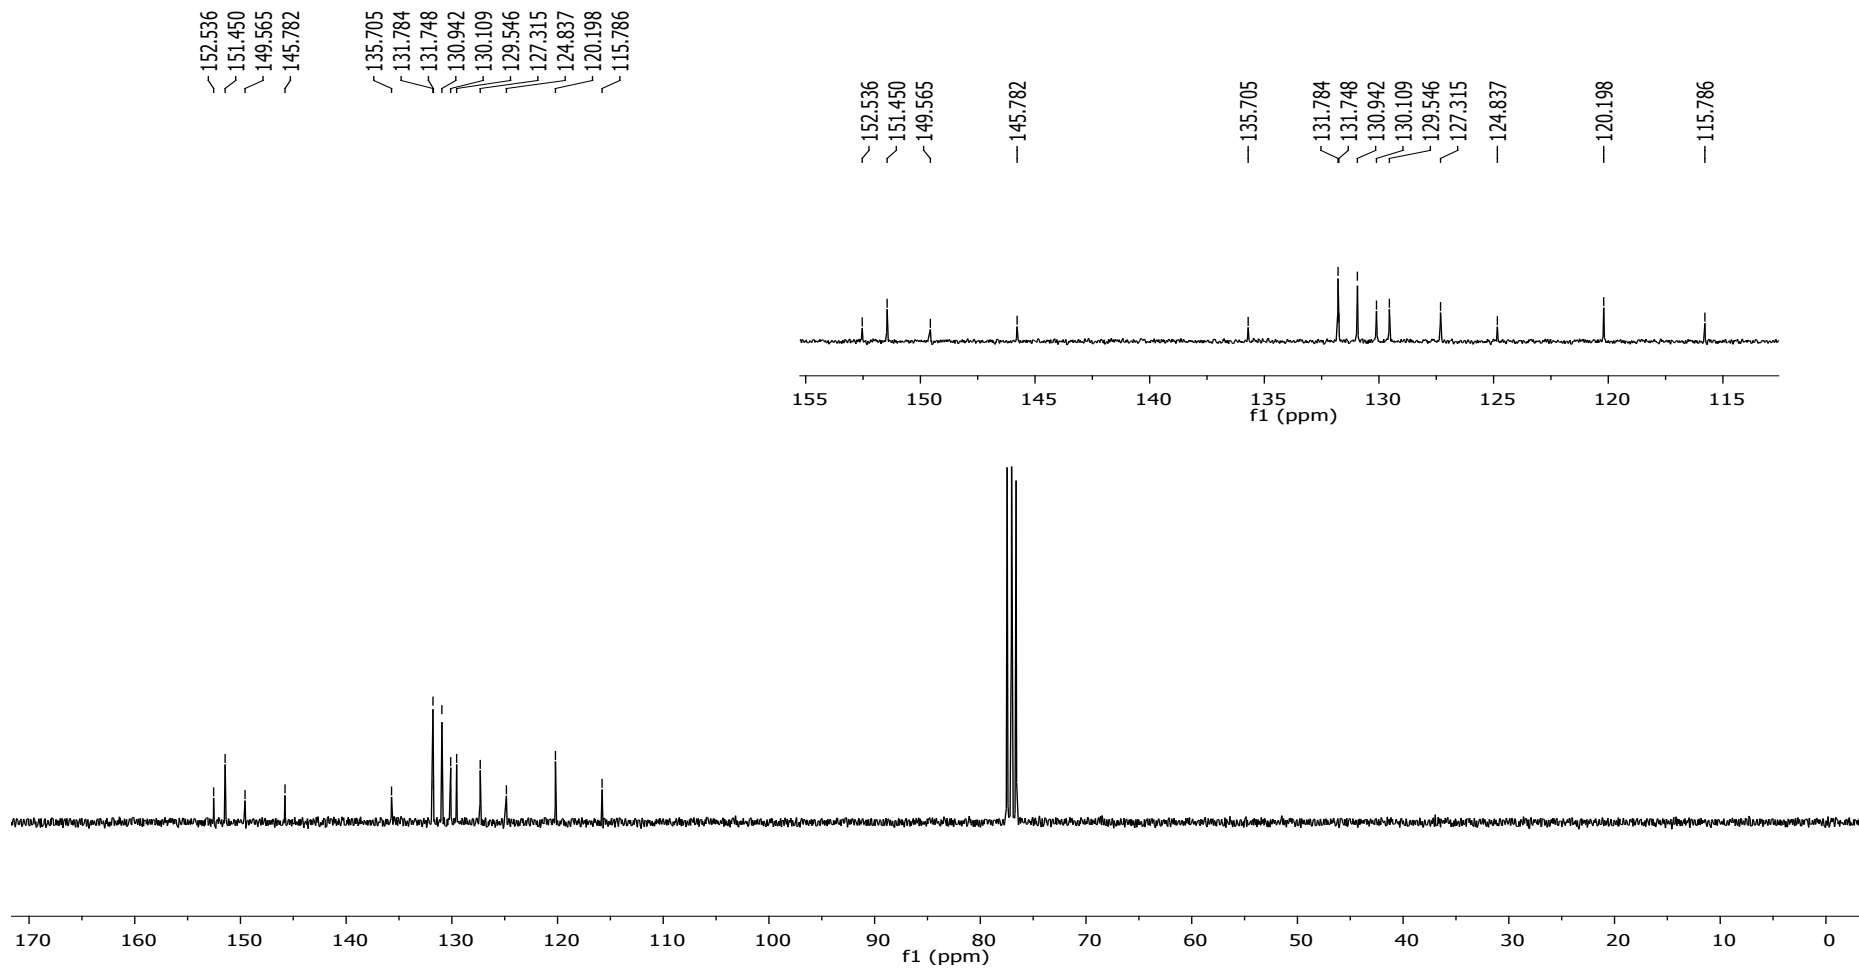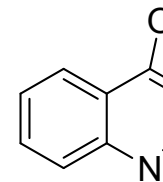

**<sup>1</sup>H-NMR(300 MHz, DMSO-d<sub>6</sub>) 4-(3-nitrophenyl)oxazolo[4,5-c]quinoline (4k)**

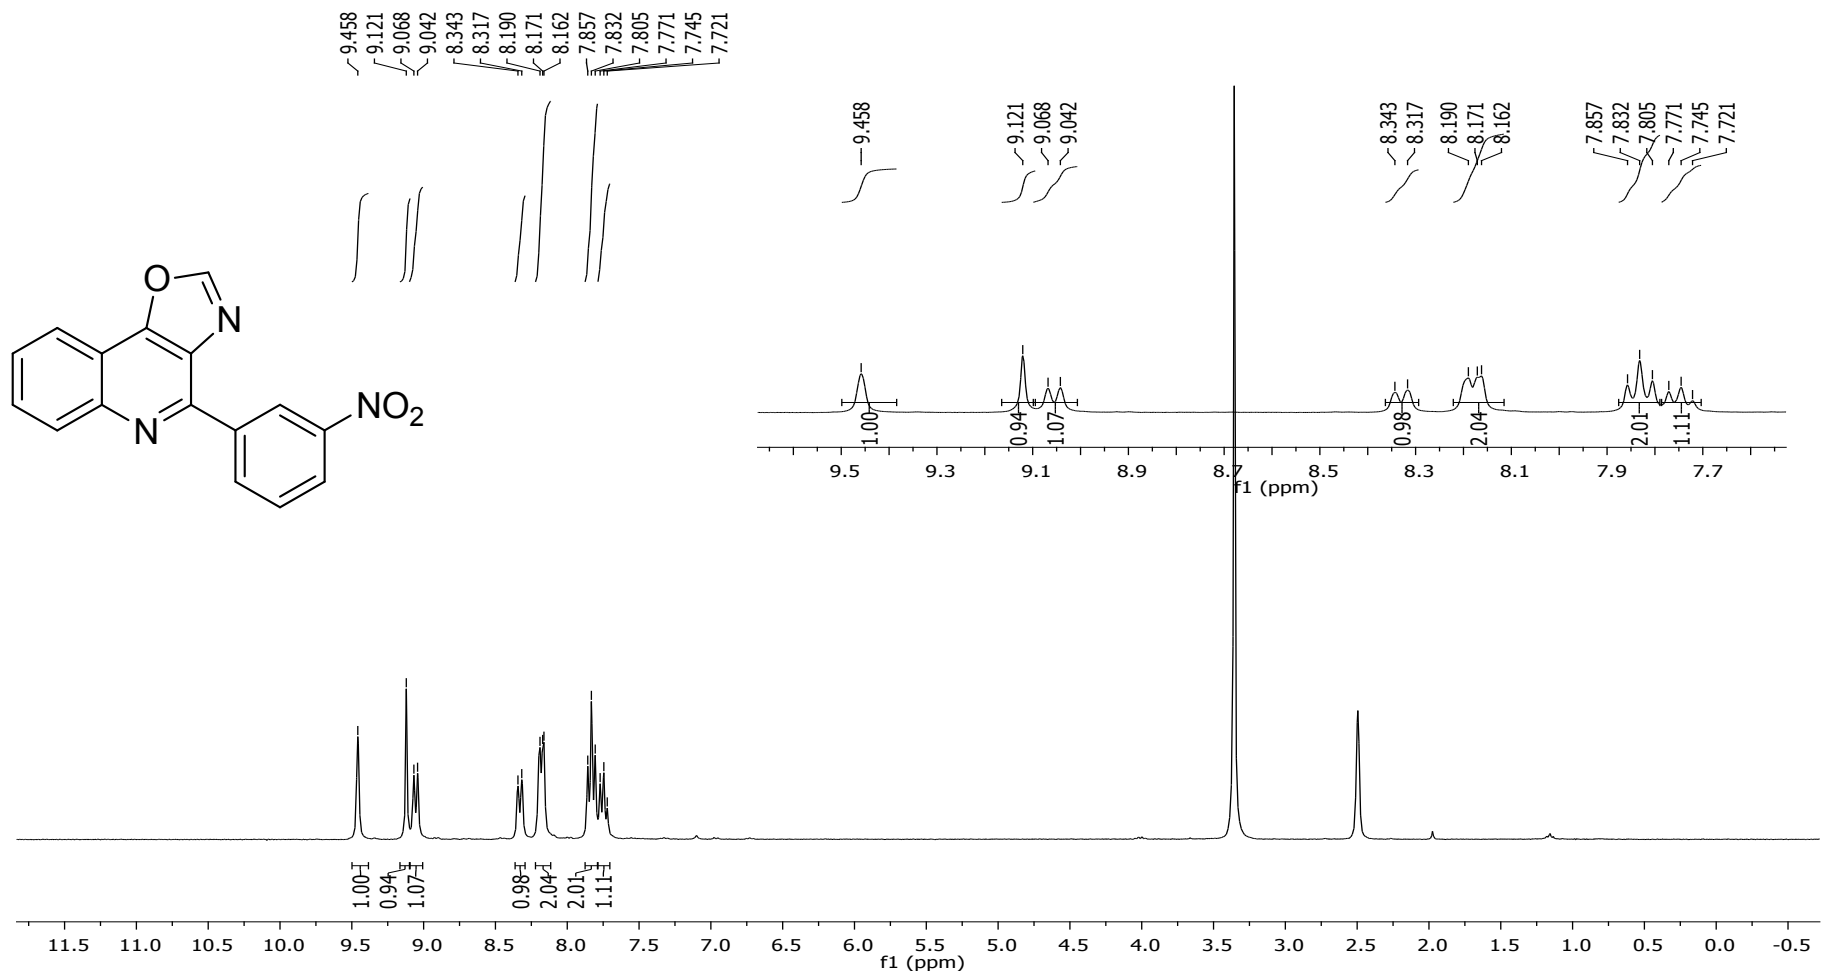

**<sup>13</sup>C-NMR(75.5 MHz, DMSO-d<sub>6</sub>) 4-(3-nitrophenyl)oxazolo[4,5-*c*]quinoline (4k)**



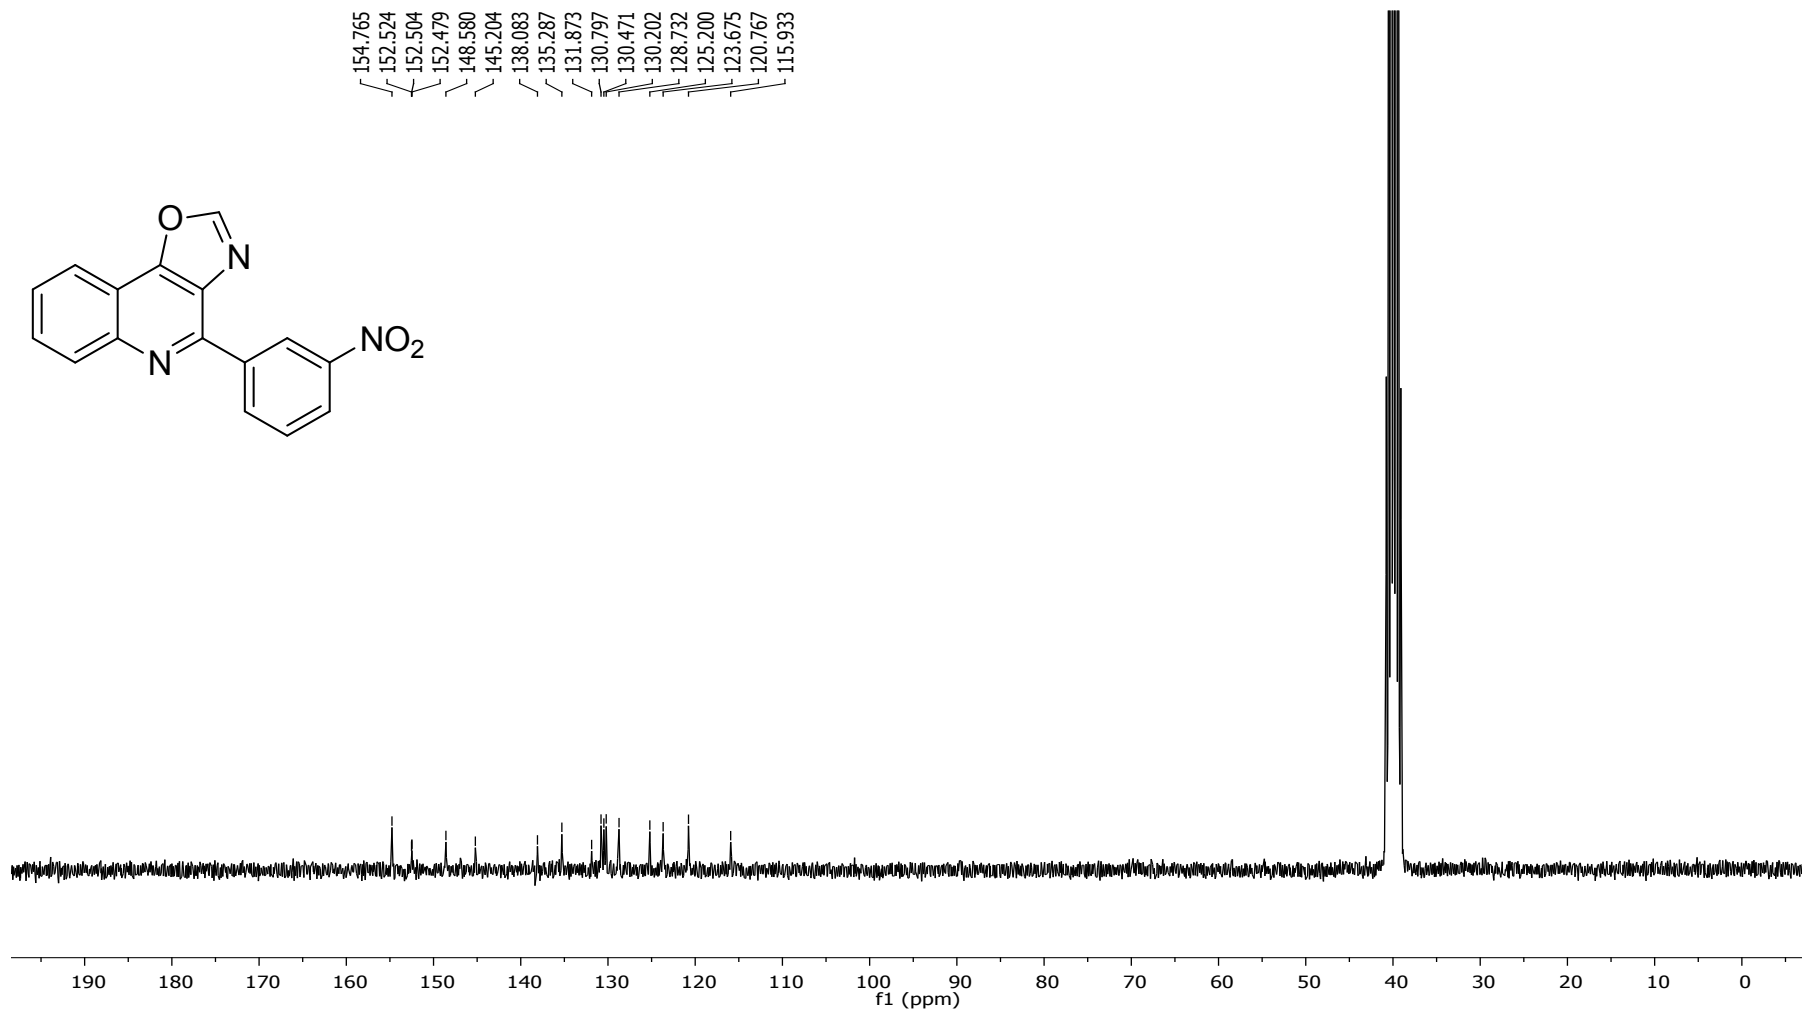

**<sup>1</sup>H-NMR(300 MHz, DMSO-d<sub>6</sub>) 4-(3-(trifluoromethyl)phenyl)oxazolo[4,5-c]quinoline (4l)**

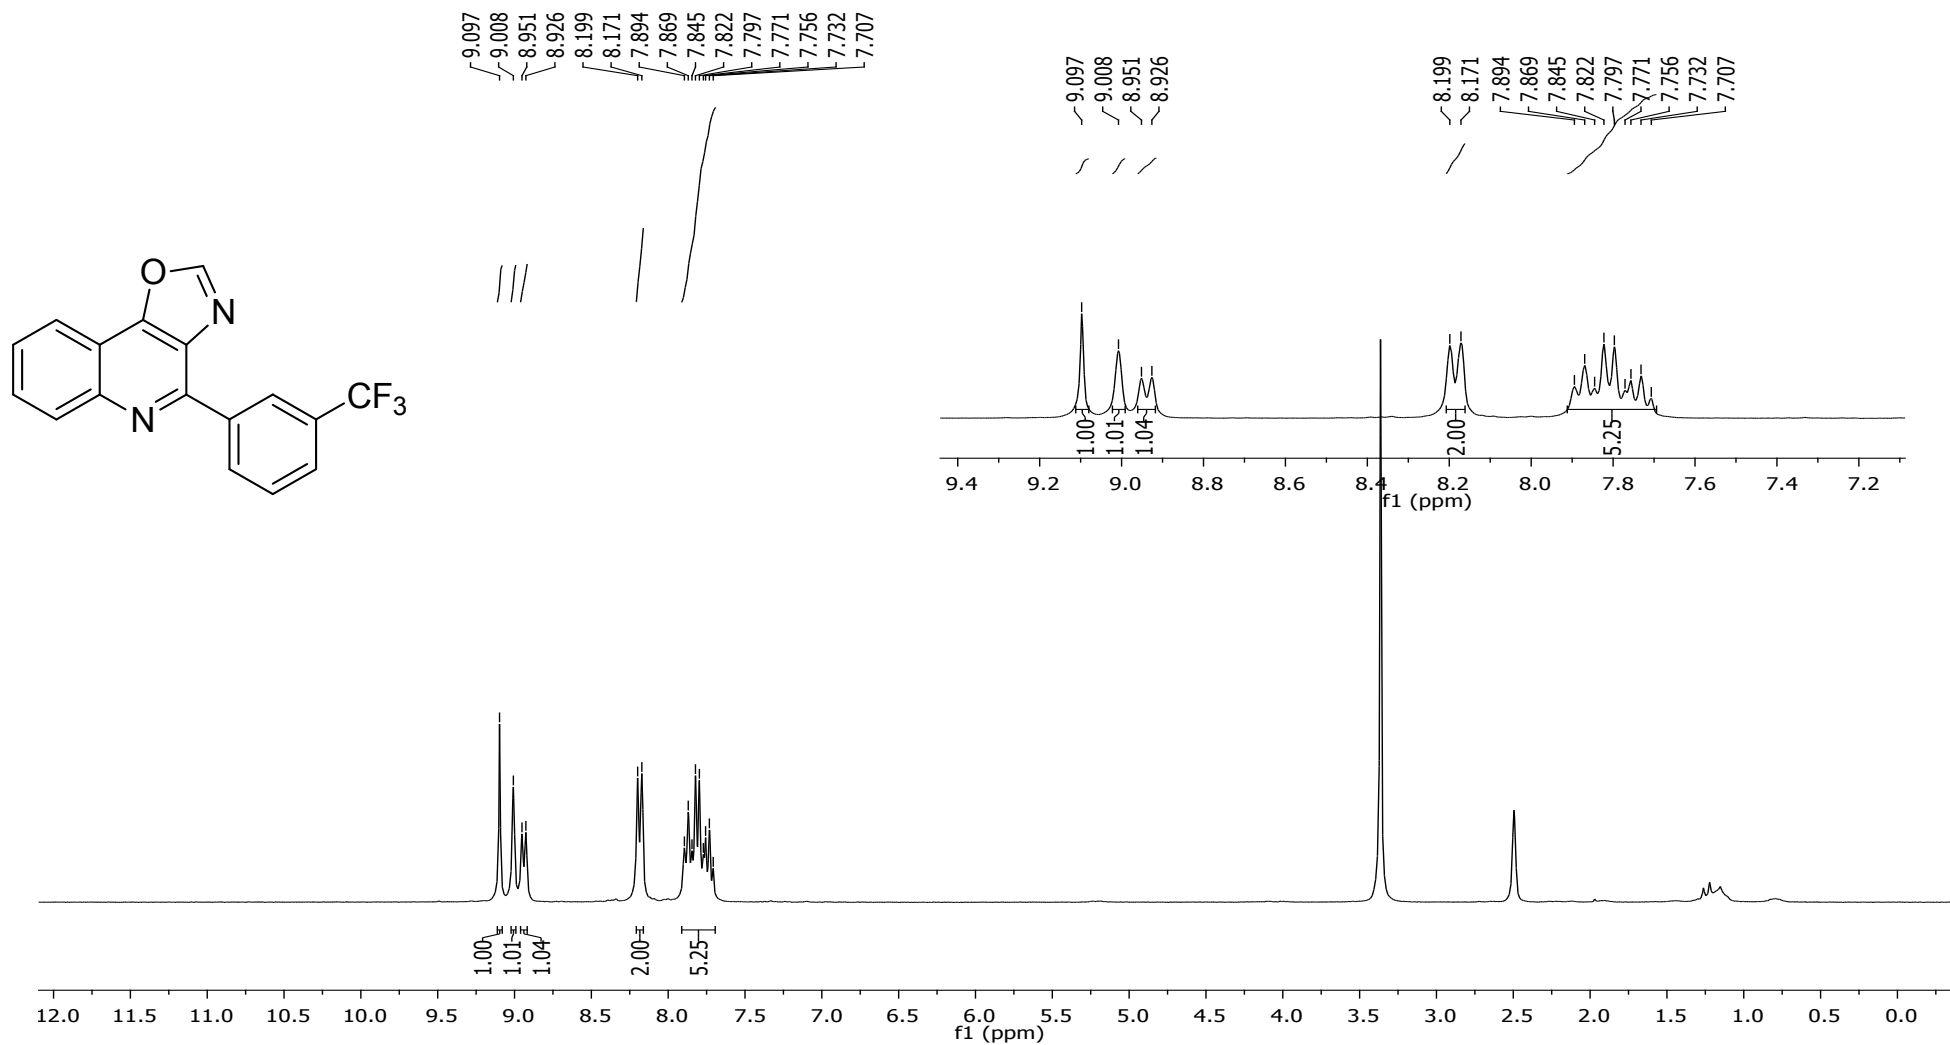

**<sup>13</sup>C-NMR(75.5 MHz, DMSO-d<sub>6</sub>) 4-(3-(trifluoromethyl)phenyl)oxazolo[4,5-c]quinoline (4l)**

154.518  
152.312  
147.589  
145.165  
137.500  
132.982  
131.746  
130.231  
130.121  
130.034  
129.607  
128.419  
127.108  
127.076  
127.054  
125.617  
125.575  
125.532  
120.612  
115.755

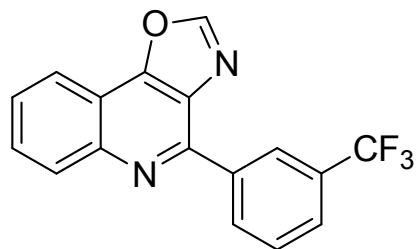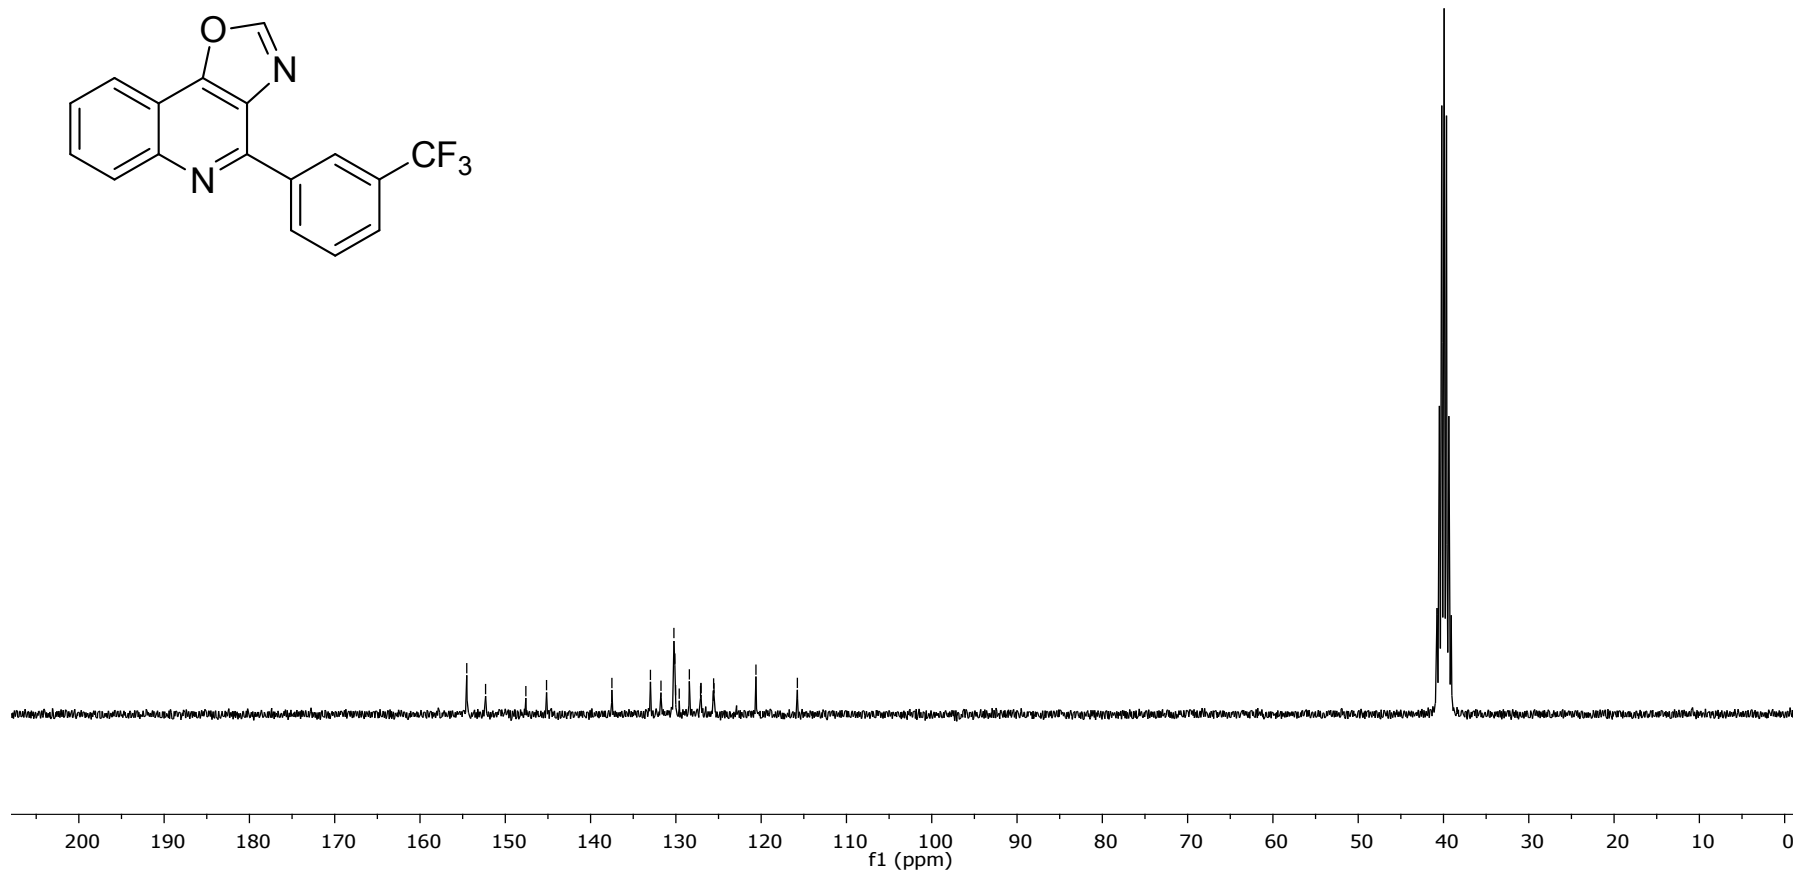

**<sup>1</sup>H-NMR(300 MHz, DMSO-d<sub>6</sub>) 4-phenyloxazolo[4,5-*c*][1,8]naphthyridine (7a)**

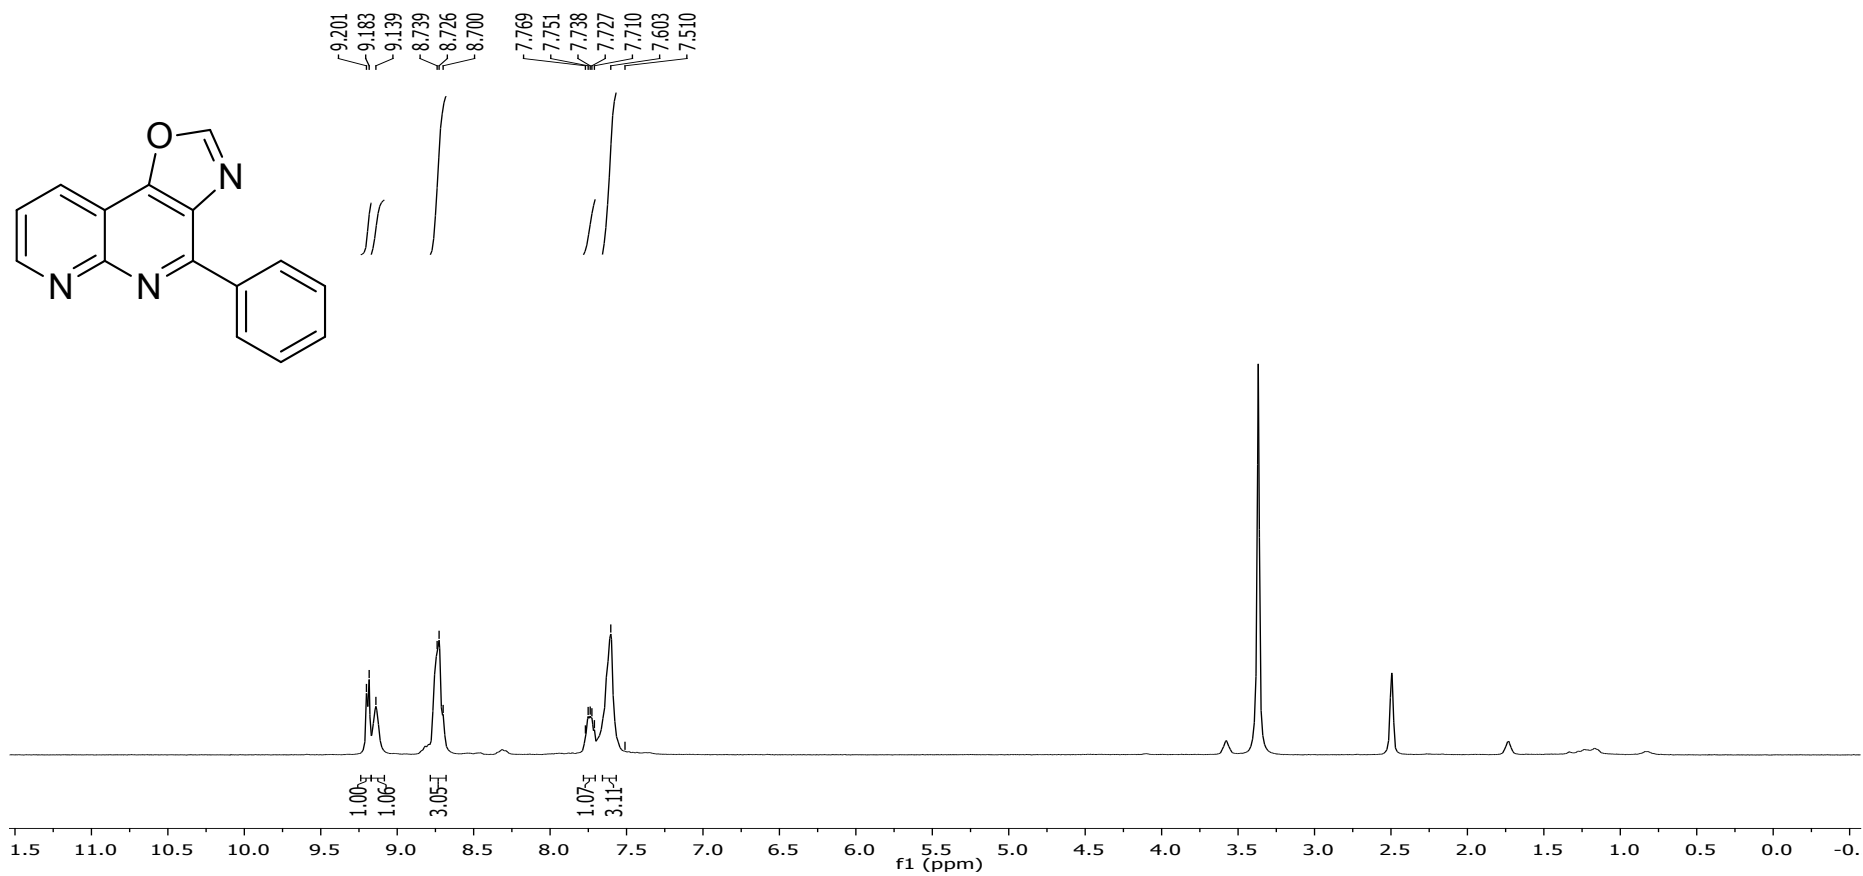

<sup>13</sup>C-NMR(75.5 MHz, DMSO-d<sub>6</sub>) 4-phenyloxazolo[4,5-c][1,8]naphthyridine (7a)

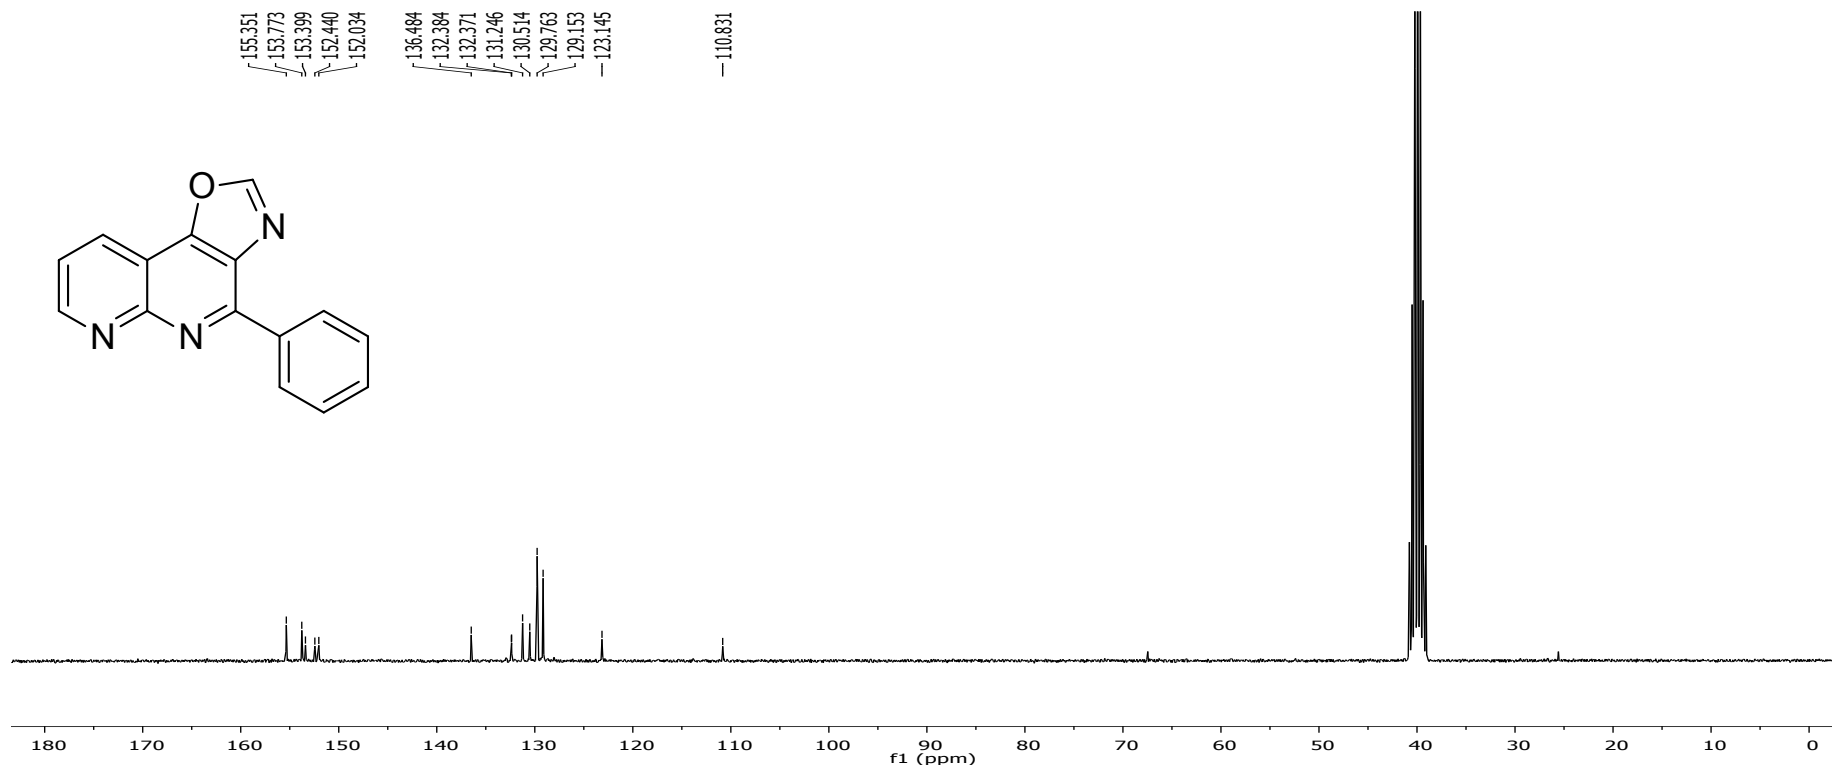

**<sup>13</sup>C-NMR(300 MHz, DMSO-d<sub>6</sub>) 4-(4-methoxyphenyl)oxazolo[4,5-c][1,8]naphthyridine (7b)**

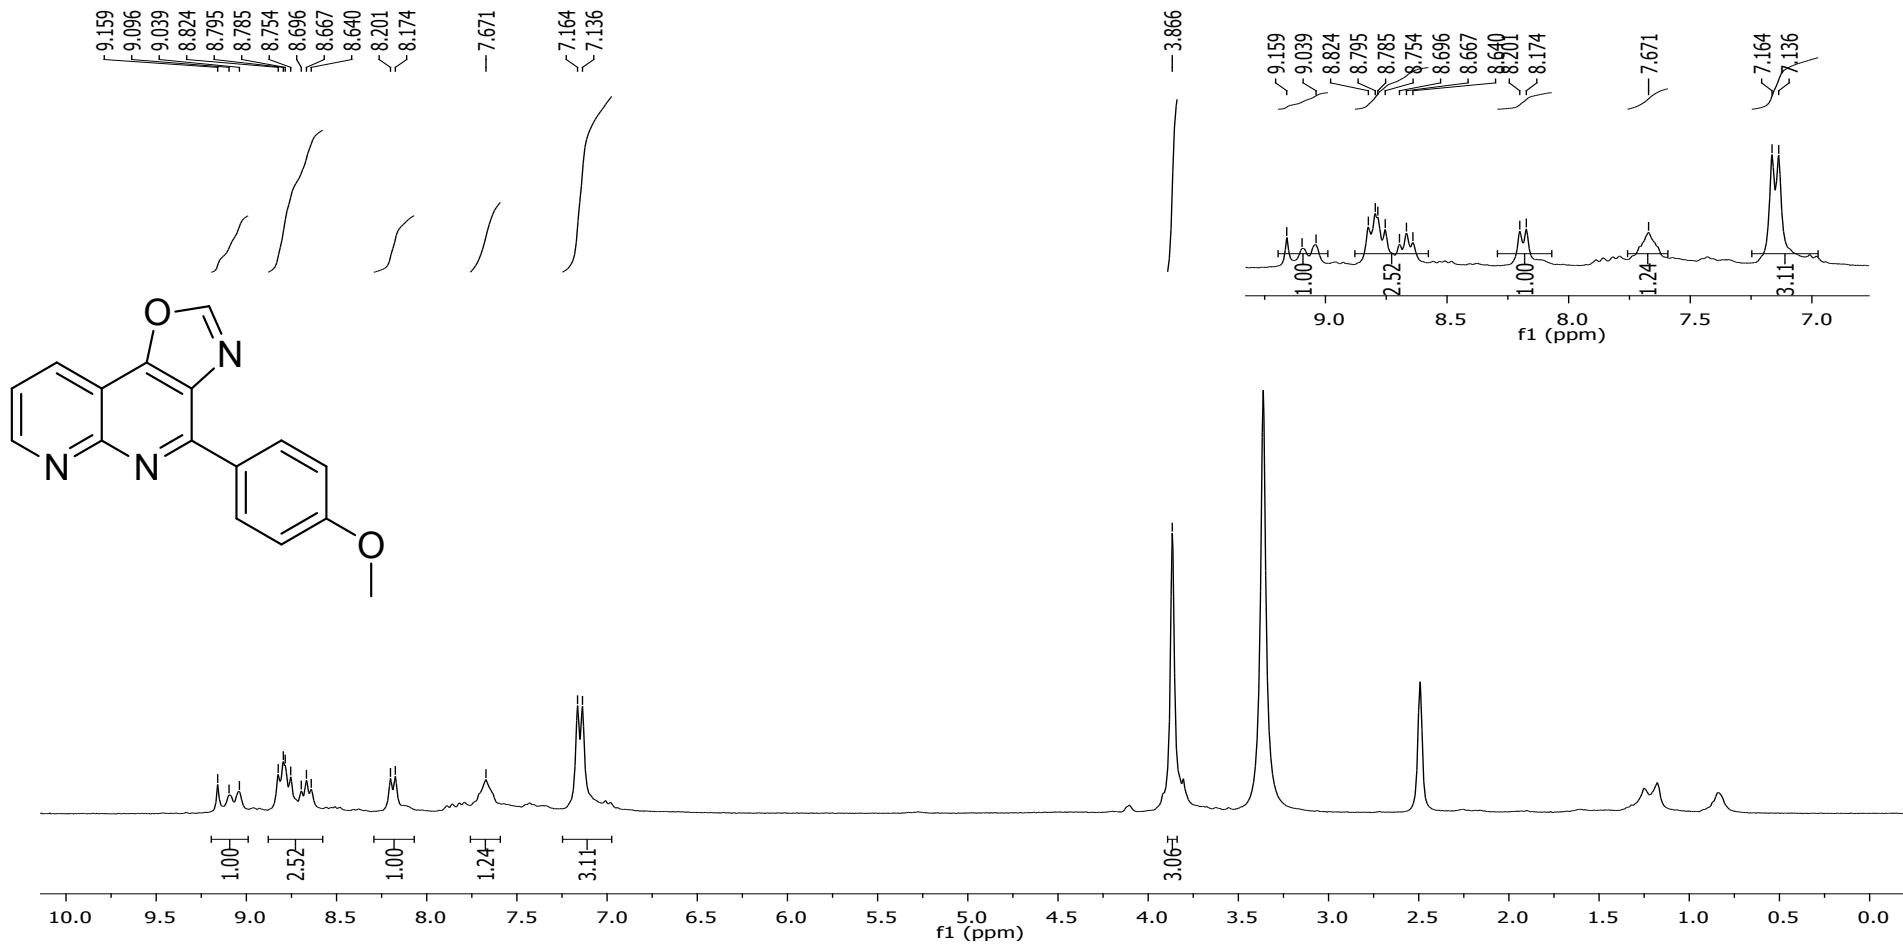

**<sup>13</sup>C-NMR(75.5 MHz, DMSO-d<sub>6</sub>) 4-(4-methoxyphenyl)oxazolo[4,5-c][1,8]naphthyridine (7b)**

— 161.417  
— 154.614  
— 153.073  
— 153.011  
— 151.787  
— 151.189  
  
— 131.470  
— 130.945  
— 129.879  
— 128.550  
— 122.132  
  
— 114.061  
— 110.016

— 55.325

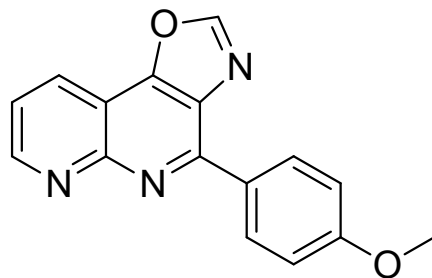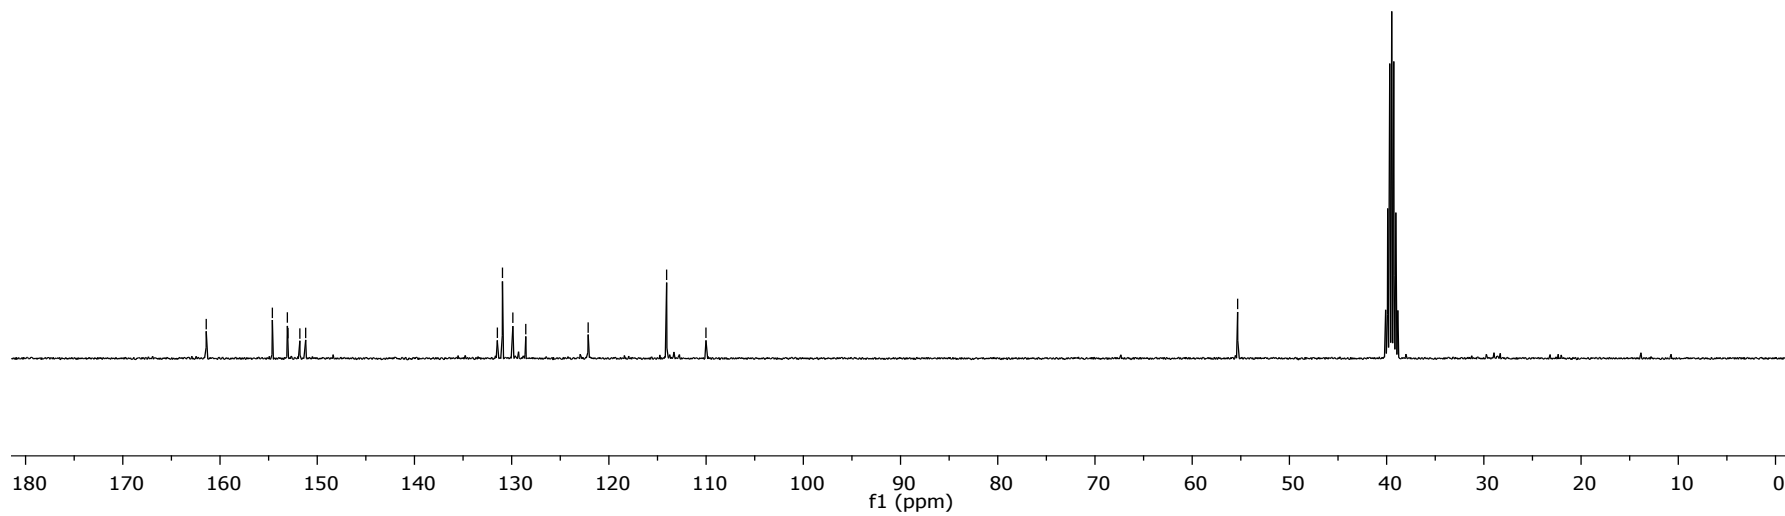

**<sup>1</sup>H-NMR(300 MHz, DMSO-d<sub>6</sub>) 2-(oxazolo[4,5-c][1,8]naphthyridin-4-yl)phenol (7c)**

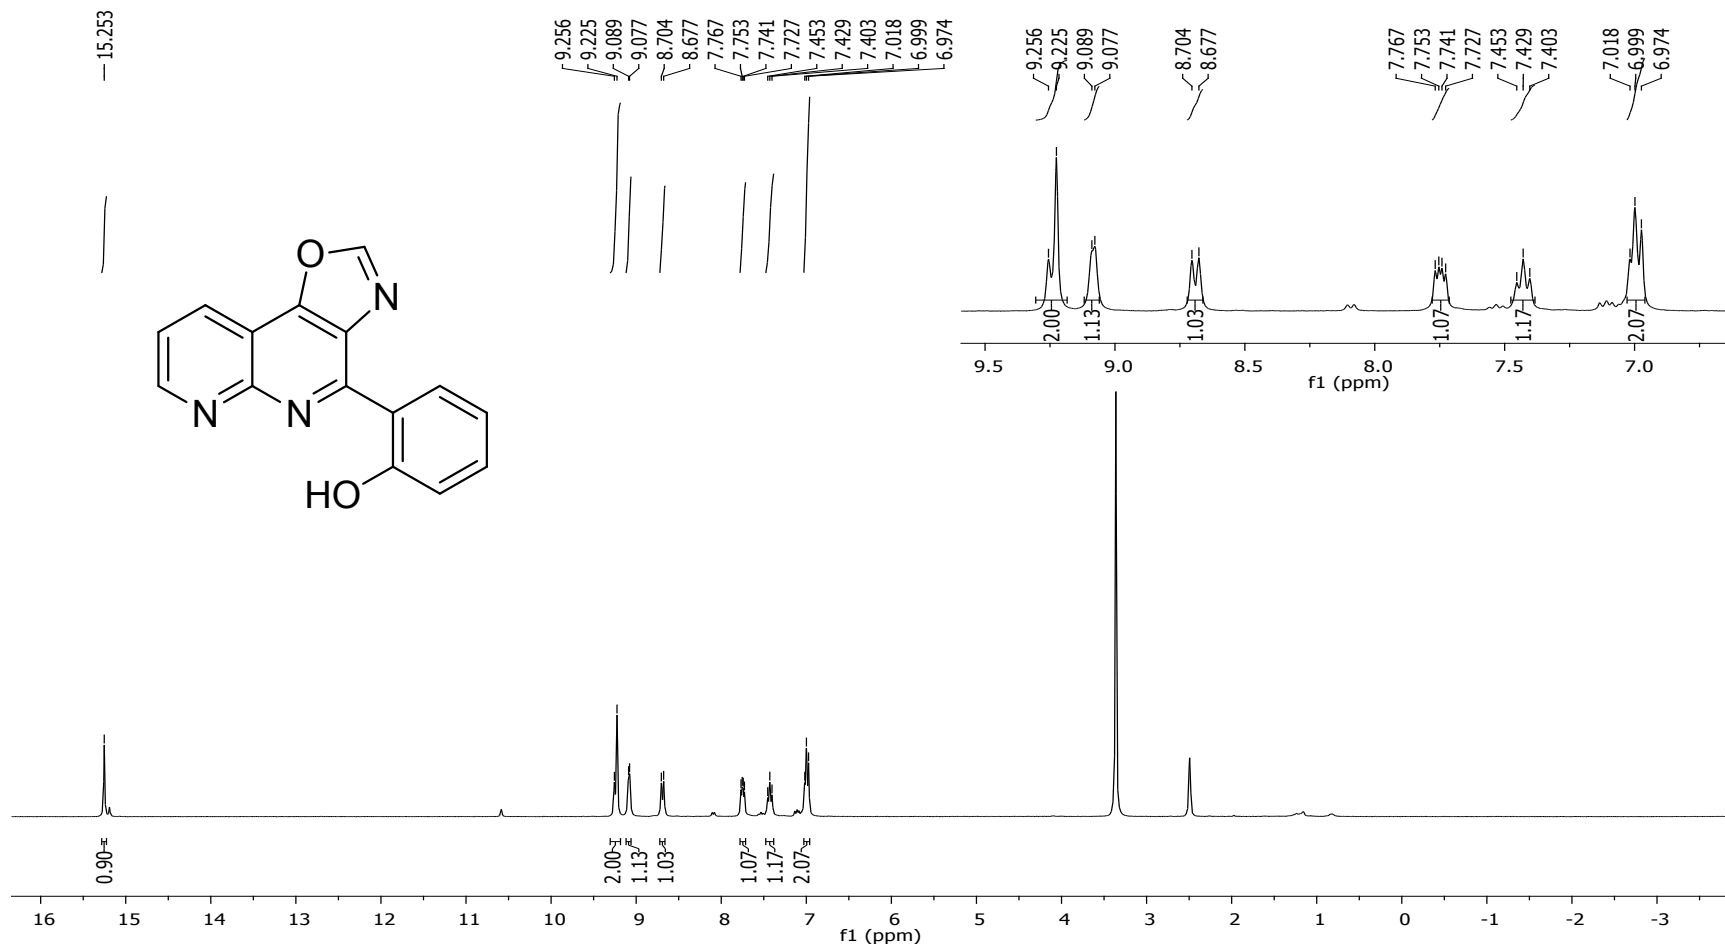



**<sup>13</sup>C-NMR(75.5 MHz, DMSO-d<sub>6</sub>) 2-(oxazolo[4,5-c][1,8]naphthyridin-4-yl)phenol (7c)**

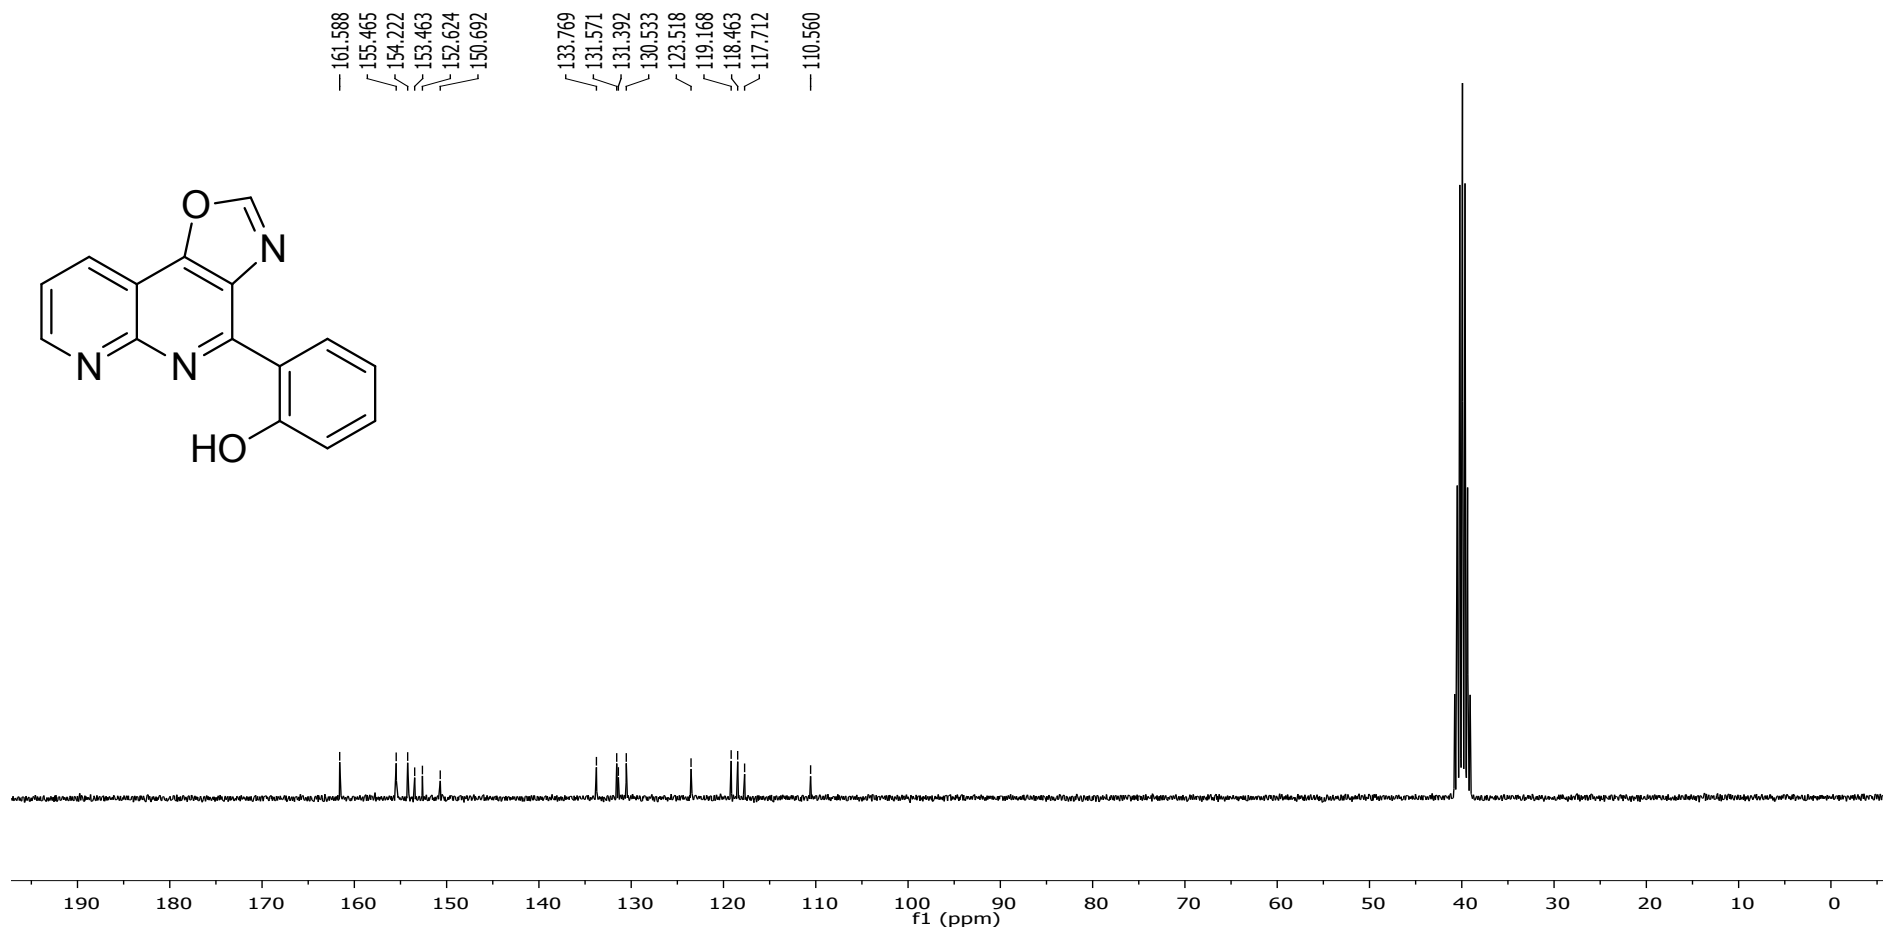

**<sup>1</sup>H-NMR(300 MHz, DMSO-d<sub>6</sub>) 4-(thiophen-2-yl)oxazolo[4,5-c][1,8]naphthyridine (7d)**

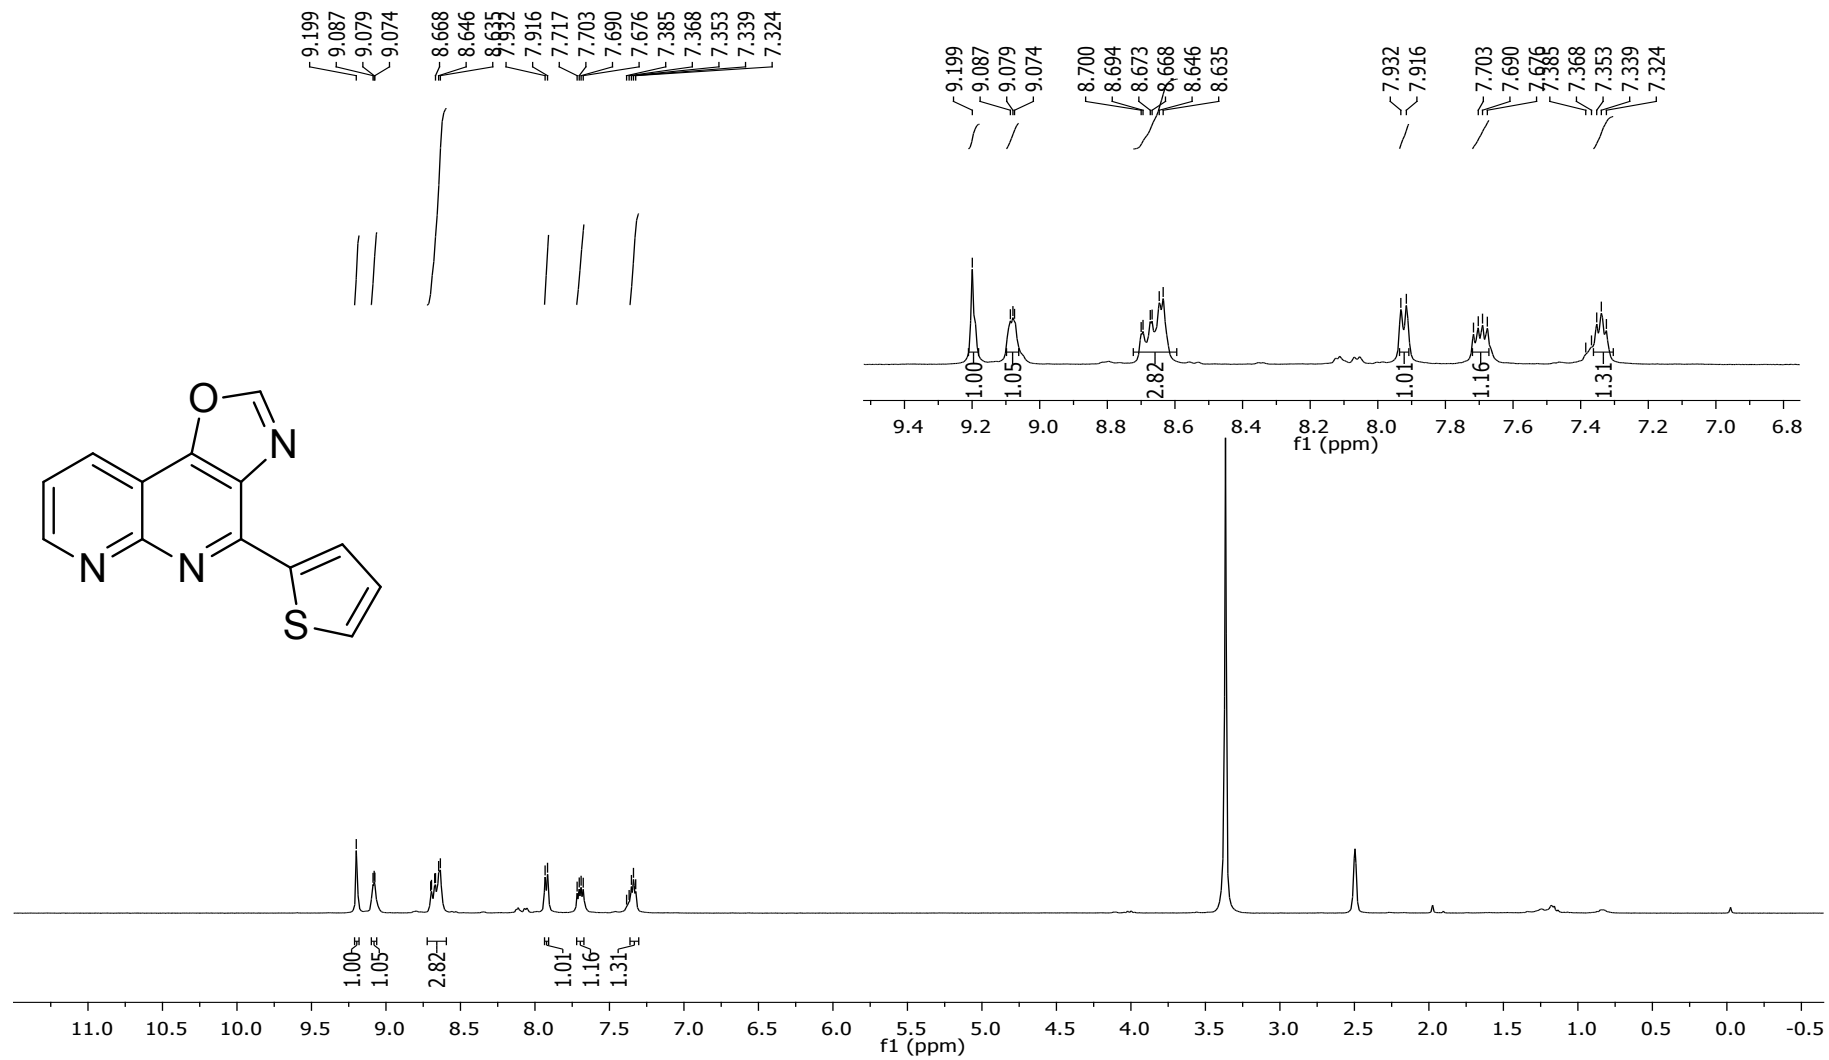

**<sup>13</sup>C-NMR(75.5 MHz, DMSO-d<sub>6</sub>) 4-(thiophen-2-yl)oxazolo[4,5-c][1,8]naphthyridine (7d)**

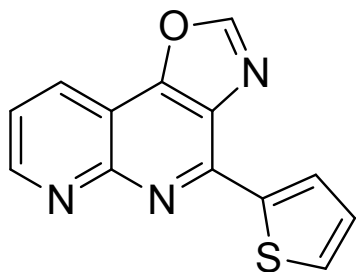

155.758  
153.715  
153.478  
152.101  
147.630  
— 141.467  
132.331  
132.179  
130.837  
130.511  
129.467  
— 122.760  
— 110.828

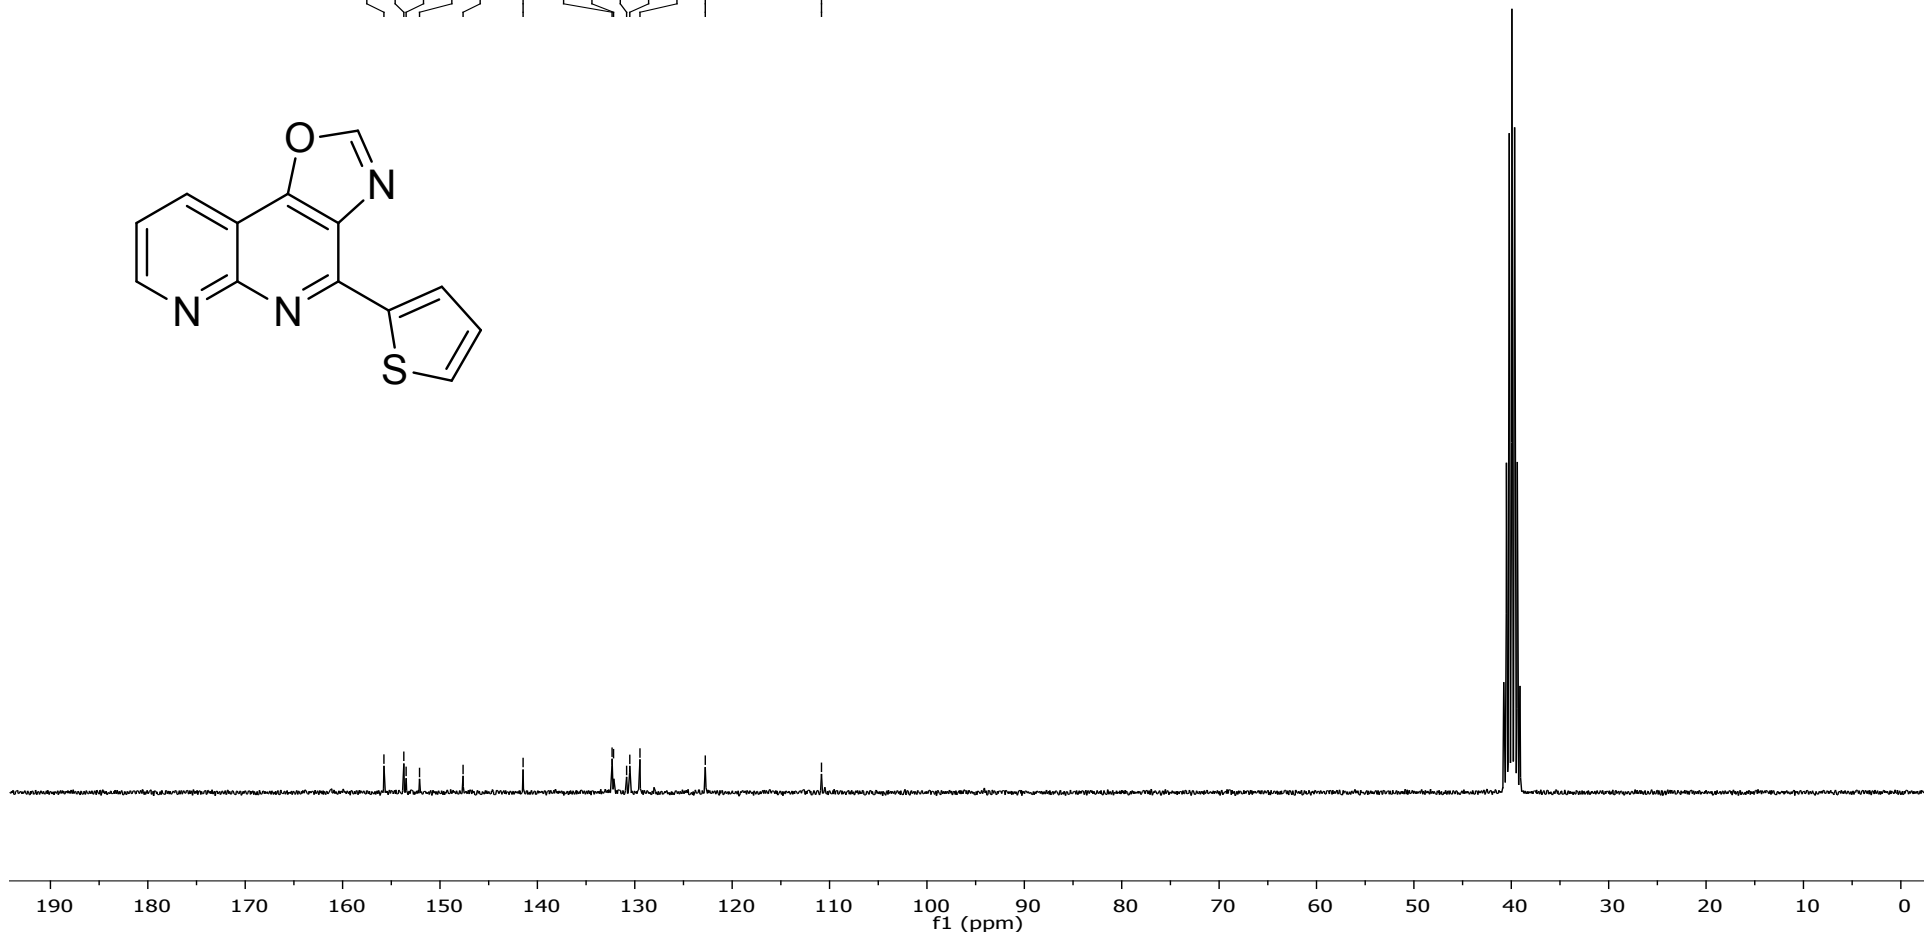

Supplement: c4ob02224f1.pdf [file c4ob02224f1.pdf]
